1 **Title:** A high dimensional quantification of mouse defensive behaviours reveals enhanced  
2 diversity and stimulus specificity

3

4 **Authors:** Riccardo Storchi<sup>1\*#</sup>, Nina Milosavljevic<sup>1</sup>, Annette E. Allen<sup>1</sup>, Antonio G. Zippo<sup>2</sup>,  
5 Aayushi Agnihotri<sup>1</sup>, Timothy F. Cootes<sup>3</sup>, Robert J. Lucas<sup>1</sup>

6

7 **Author affiliations:**

8 <sup>1</sup> Division of Neuroscience and Experimental Psychology

9 School of Biological Science,

10 Faculty of Biology, Medicine and Health,

11 University of Manchester,

12 UK

13 <sup>2</sup> Institute of Neuroscience

14 Consiglio Nazionale delle Ricerche,

15 Milan,

16 Italy

17 <sup>3</sup> Division of Informatics, Imaging & Data Science

18 School of Health Science,

19 Faculty of Biology, Medicine and Health,

20 University of Manchester,

21 UK

22

23 **Correspondence:** [riccardo.storchi@manchester.ac.uk](mailto:riccardo.storchi@manchester.ac.uk)

24

25 \*Lead Contact; #Corresponding Author

26 **Summary**

27

28 Instinctive defensive behaviours, consisting of stereotyped sequences of movements and  
29 postures, are an essential component of the mouse behavioural repertoire. Since defensive  
30 behaviours can be reliably triggered by threatening sensory stimuli, the selection of the most  
31 appropriate action depends on the stimulus property. However, since the mouse has a wide  
32 repertoire of motor actions, it is not clear which set of movements and postures represent  
33 the relevant action. So far this has been empirically identified as a change in locomotion state.  
34 However, the extent to which locomotion alone captures the diversity of defensive  
35 behaviours and their sensory specificity is unknown.

36 To tackle this problem we developed a method to obtain a faithful 3D reconstruction of the  
37 mouse body that enabled to quantify a wide variety of motor actions. This higher dimensional  
38 description revealed that defensive behaviours are more stimulus-specific than indicated by  
39 locomotion data. Thus, responses to distinct stimuli that were equivalent in terms of  
40 locomotion (e.g. freezing induced by looming and sound) could be discriminated along other  
41 dimensions. The enhanced stimulus-specificity was explained by a surprising diversity. A  
42 clustering analysis revealed that distinct combinations of movements and postures, giving rise  
43 to at least 7 different behaviours, were required to account for stimulus-specificity.  
44 Moreover, each stimulus evoked more than one behaviour revealing a robust one-to-many  
45 mapping between sensations and behaviours that was not apparent from locomotion data.  
46 Our results indicate that diversity and sensory specificity of mouse defensive behaviours  
47 unfold in a higher dimensional space spanning multiple motor actions.

48

49 **Keywords:** defensive behaviours, 3D reconstruction, Statistical Shape Models,  
50 computational ethology, behavioural clustering, stimulus decoding, information theory,  
51 Variable-order Markov Chains, freezing, looming

52

53

## 54 Introduction

55

56 Mice are innately able to respond to changes in their sensory landscape by producing  
57 sequences of actions aimed at maximizing their welfare and chances for survival. Such  
58 spontaneous behaviors as exploration [1, 2], hunting [3, 4], and escape and freeze [5-8], while  
59 heterogeneous, share the key property that they can be reproducibly elicited in the lab by  
60 controlled sensory stimulation. The ability of sensory stimuli to evoke a reproducible  
61 behavioural response in these paradigms makes them an important experimental tool to  
62 understand how inputs are encoded and interpreted in the brain, and appropriate actions  
63 selected [5, 8-10].

64 Realizing the full power of this approach, however, relies upon a description of evoked  
65 behaviors that is sufficiently complete to encompass the full complexity of the motor  
66 responses and to capture the relevant variations across different stimuli or repeated  
67 presentations of the same stimulus. Instinctive defensive behaviours, such as escape or  
68 freeze have been defined on the basis of a clear phenotype – a sudden change in locomotion  
69 state. Thus in the last few years it has been shown that speed, size, luminance and contrast  
70 of a looming object have different and predictable effects on locomotion [5-8]. Nevertheless,  
71 mice do more than run, and a variety of other body movements as well as changes in body  
72 orientation and posture could, at least in principle, contribute to defensive behaviours. In line  
73 with this possibility a wider set of defensive behaviours including startle reactions and  
74 defensive postures in rearing positions have been qualitatively described in rats [11, 12].  
75 However, until now, a lack of tools to objectively measure types of movement other than  
76 locomotion has left that possibility unexplored.

77 We set out here to ask whether a richer quantification of mouse defensive behaviours was  
78 possible and, if so, whether this could provide additional information about the relationship  
79 between sensation and actions. To this end we developed a method that enables to obtain a  
80 3D reconstruction of mouse poses. We then used this method to generate a higher  
81 dimensional representation of mouse defensive behaviours which enabled to quantify a wide  
82 range of body movements and postures.

83 We found that defensive responses to simple visual and auditory stimuli encompass  
84 numerous motor actions and accounting for all those actions provides a richer description of  
85 behaviour by increasing the dimensionality of behavioural representation. This increase  
86 provides an improved understanding of defensive behaviours in several respects. First,  
87 behavioural responses are more specific to distinct stimuli than is apparent simply by  
88 measuring locomotion. Second, higher specificity can be explained by the appearance of a  
89 richer repertoire of behaviours, with equivalent locomotor responses found to differ in other  
90 behavioural dimensions. Third, each class of sensory stimuli can evoke more than one type of  
91 behaviour, revealing a robust ‘one-to-many’ map between stimulus and response that is not  
92 apparent from locomotion measurements.

## 93 **Results**

94

### 95 **A method for quantifying multiple motor actions**

96

97 The first aim of this study was to develop a method that enables to obtain a 3D reconstruction  
98 of mouse poses. Five different landmarks on the mouse body (nose tip, left & right ears, neck  
99 base and tail base, **Fig. 1A**) were tracked using four cameras mounted at the top of an open  
100 field arena that we used throughout the study (**Fig. S1A&B**). The 3D pose of the animal was  
101 first reconstructed by triangulation of landmark coordinates across the four camera views  
102 (**Fig. 1B, Raw**; see **STAR Methods** section **Reconstruction of 3D poses** and **Fig. S1C-F** for  
103 details). This initial reconstruction was then refined by using a method we established for this  
104 study (**Fig. 1B, Refined**; see **STAR Methods** section **Reconstruction of 3D poses**, **Fig. S2** and  
105 **Supplementary Movie 1** for details). These pre-processing stages allowed us to describe, on  
106 a frame-by-frame basis, the mouse pose  $\mathbf{X}$  as

107

$$\mathbf{X}(t) = \left( \bar{\mathbf{X}} + \sum_{i=1}^{N_{eigenposes}} \mathbf{P}_i b_i(t) \right) \mathbf{R}(t) + \mathbf{T}(t) \quad (1)$$

108

109 Where:  $t$  represents the time of the current frame;  $\mathbf{X}$  the coordinates of the body landmarks;  
110  $\bar{\mathbf{X}}$  the body coordinates of the mean pose;  $\mathbf{P}_i$  the mouse eigenposes;  $b_i$  the shape parameters  
111 allowing to keep track of the changes in the body shape (**Fig. 1C, Body Shape**);  $\mathbf{R}$  and  $\mathbf{T}$  the  
112 rigid transformations (rotation and translation) encoding the animal's position in the  
113 behavioural arena (**Fig. 1C, Body Position**). Both  $\bar{\mathbf{X}}$  and  $\mathbf{P}_i$  were obtained by training a  
114 Statistical Shape Model (SSM, *equation 2* in **STAR Methods** section **Reconstruction of 3D**  
115 **poses**) on a separate dataset of mouse poses. Those poses were first aligned and a principal  
116 component analysis was performed to identify the eigenposes  $\mathbf{P}_i$ , i.e. the directions of largest  
117 variance with respect to  $\bar{\mathbf{X}}$ . Applying the SSM enabled to correct for outliers in the initial 3D  
118 reconstruction and to reduce high dimensional noise while preserving meaningful changes in  
119 body shape (see **STAR Methods** section **Validation of the 3D reconstruction** and **Fig. S2** for  
120 details). The first two eigenposes captured respectively body elongation and bending (**Fig. 1C,**  
121 **Body Shape**), two important descriptors of the mouse posture that explained respectively  
122 43% and 31% of the variance associated with changes in body shape (see **STAR Methods**  
123 section **Interpretation of the eigenposes**, **Fig. S3** and **Supplementary Movie 2** for details).

124 Based on this analytical description of the mouse pose we developed two sets of measures to  
125 quantify distinct postures and movements. The first set of measures, rearing, body elongation  
126 and body bending, allowed us to capture different aspects of the mouse posture (**Fig. 1D,**  
127 **Postural Measures**). The second set, constituted by locomotion, freezing, rigid body rotation  
128 and changes in rearing, body elongation and body bending allowed us to capture different  
129 types of body movements (**Fig. 1D, Movement Measures**). For all the analyses the measures  
130 in **Fig. 1D** were normalized and ranged in the interval [0,1] (see **STAR Methods** section  
131 **Normalization of the behavioural measures** for details). These automatic measures were  
132 consistent with the human-based identification of walking, body turning, freezing and rearing  
133 obtained from manual annotation of the behavioural movies (see **STAR Methods** section  
134 **Validation of postural and movement measures** and **Fig. S4** for details).

135

## 136 **Measuring multiple motor actions provides a higher dimensional representation of** 137 **behaviour**

138

139 We set out to investigate the extent to which our measures of postures and movements were  
140 involved in defensive behaviours. The animals were tested in an open field arena in which no  
141 shelter was provided. In order to capture a wide range of behavioural responses we used  
142 three different classes of sensory stimuli: two visual, one auditory. Among visual stimuli we  
143 selected a bright flash and a looming object. We have previously shown that these two stimuli  
144 evoke distinct and opposite behavioural responses, with the former inducing an increase in  
145 locomotor activity while the latter abolishes locomotion by inducing freezing behaviour [7].  
146 The auditory stimulus was also previously shown to induce defensive responses such as freeze  
147 or startle [6, 13] (see **STAR Methods** sections **Behavioural experiments**, **Visual and auditory**  
148 **stimuli** and **Experimental set-up** for details on sensory stimuli and experiments).

149 We separately averaged all trials according to stimulus class and we found that all our  
150 measures were involved in defensive behaviours (**Fig. 2A**). To estimate responses divergence  
151 (RD) across stimuli we calculated the pairwise Euclidean distance between average responses  
152 and we normalized this distance with that obtained by randomizing the association between  
153 stimuli and responses (**Fig. 2A, insets**; see **STAR Methods** section **Response Divergence** for  
154 details). Across most measures (except rearing for loom and body bend for sound, see **Fig.**  
155 **2A, insets**) the average response to the flash clearly diverged from those elicited by other  
156 stimuli (RD =  $6.28 \pm 2.40SD$ ,  $p < 0.001$  for  $n = 16$  pairwise comparisons, shuffle test). Average  
157 responses to looming and sound were all significant but less divergent (**Fig. 2A, insets**; RD =  
158  $2.52 \pm 1.21SD$ ,  $p < 0.001$  for  $n = 9$  pairwise comparisons, shuffle test).

159

160 To determine whether the inclusion of all our measures of movements and postures,  
161 hereafter the ‘full set’, increased the dimensionality of our behavioural description, we  
162 performed a Principal Component Analysis (PCA) on the response matrix. For locomotion,  
163 each row of the response matrix represented a trial ( $n=516$  trials) and each trial contained 30  
164 dimensions associated with the 0-2s epoch of the locomotion time series (sample rate = 15  
165 frames/s). For the full set, each trial contained 270 dimensions (30 time points x 9 measures).  
166 This analysis revealed that, for the full set, 34 principal components were required to explain  
167 >80% variance, while 5 dimensions were sufficient for locomotion alone (**Fig. 2B**). In principle  
168 the increase in dimensionality observed in the full set could be trivially explained by a  
169 disproportionate increase in measurement noise. To test for this possibility, we estimated the  
170 rank of the response matrix by applying the Bi-Cross Validation technique [14] (see **STAR**  
171 **Methods** section **Rank estimation** for details). Consistent with the PCA analysis, we found  
172 that the rank of the full set was substantially larger, ~two-fold (**Fig. 2C**), indicating that the full  
173 set provided a genuine increase in dimensionality.

174

## 175 ***Higher dimensionality reveals increased stimulus specificity in defensive behaviours***

176

177 We then asked whether this increased dimensionality could capture additional aspects of  
178 stimulus-response specificity that could not be observed in locomotion. To account for the  
179 fact that evoked responses developed over time we divided the responses into three  
180 consecutive epochs of 1s duration according to their latency from the stimulus onset (“early”:  
181 0-1s; “intermediate”: 1-2s; “late”: 2-3s).

182 We first looked for a specific condition in which the same level of locomotion was expressed  
183 in response to two distinct sensory stimuli. A simple illustrative example, where locomotion  
184 largely fails to capture stimulus-response specificity, is the case in which both looming and  
185 sound induce a common freezing pattern that could be observed in a subset of trials (**Fig. 3A**,  
186 top panels; see also **Supplementary Movies 3, 4**). In the intermediate response epoch, when  
187 freezing is strongest, locomotion “saturates” towards 0 in responses to both stimuli and thus  
188 provides no discrimination ( $p = 0.48$ , shuffle test for RD,  $n = 37$  and 31 trials for loom and  
189 sound). However, stimulus-specificity is apparent in the animal’s posture as revealed by  
190 quantifying body elongation (**Fig. 3A**, bottom panels  $p = 0.001$ , shuffle test for RD,  $n = 37$  and  
191 31).

192  
193 To systematically compare stimulus-response specificity across all trials ( $n=172$  trials per  
194 stimulus) for the full set with the level of specificity revealed by locomotion alone we  
195 developed a simple Specificity Index (**SI**). On an individual trial basis, **SI** identified, within a  $d$ -  
196 dimensional space, the  $k$  most similar behavioural responses across our dataset and  
197 quantified the fraction of those responses that were associated with the same stimulus. A toy  
198 example in which **SI** is calculated for  $k = 6$  in a two dimensional dataset is depicted in **Fig. 3B**.  
199 Thus, on a given trial, **SI** ranged from 0 to 1, in which 1 signifies all similar behavioural  
200 responses being elicited by the same stimulus, 0.5 similar responses being equally expressed  
201 for both stimuli, and 0 all similar responses being elicited by another stimulus (**Fig. 3B**). For  
202 the real data we used a weighted version of the **SI** index where the contribution of each  
203 neighbour response was inversely proportional to its distance from the target response (see  
204 **STAR Methods** section **Stimulus-response specificity** for a formal definition of the **SI**). The **SI**  
205 was applied to a Principal Component reduction of the response matrix ( $n = 15$  and  $n = 15 \times 9$   
206 = 135 time points for locomotion and the full set respectively) and evaluated for pairwise  
207 comparisons between the 3 sensory stimuli. Since **SI** was dependent upon  $k$  and  $d$  we  
208 systematically varied those parameters and we recalculated **SI** for each parameter  
209 combination. Almost invariably **SI** was maximized for  $k = 1$  both for the full set and for  
210 locomotion only (**Fig. S5A**). At least 5 Principal Components were typically required to  
211 maximize **SI** and the best value for  $d$  varied across different comparisons (**Fig. S5B**). Therefore  
212 low dimensional responses (e.g. based on the first two components as in **Fig. S5C**) failed to  
213 capture the full specificity of behavioural responses. Responses from the same animals were  
214 no more similar than those obtained from different animals since, for any given trial in the  
215 dataset, the most similar response rarely belonged to the same animal ( $n = 21$ , 10 trials out  
216 of 516 for full set and locomotion across all stimuli;  $p = 0.205, 0.957$ , shuffle test). Moreover  
217 the distance between each target trial and its nearest neighbour was on average the same  
218 irrespectively of whether they shared the same stimulus or not (**Fig. S5D**).

219  
220 We then compared **SI** between locomotion and the full set for  $k = 1$  and the parameter  $d$  that  
221 returned the highest trial-averaged **SI**. We found no significant differences when comparing  
222 flash and loom (**Fig. 3C**, blue bars;  $p = 0.0674, 0.2416, 0.0701$  for 0-1s, 1-2s, 2-3s epochs, sign-  
223 test,  $n = 344$  trials). However the full set provided an increase in specificity for early responses  
224 when comparing flash and sound (**Fig. 3C**, red bars;  $p = 0.0002, 0.4570, 0.1980$  for 0-1s, 1-2s,  
225 2-3s epochs, sign-test,  $n = 344$  trials) and for the early and intermediate responses when  
226 comparing loom and sound (**Fig. 3C**, red bars;  $p = 0.0254, 0, 0.5935$  for 0-1s, 1-2s, 2-3s epochs,  
227 sign-test,  $n = 344$  trials). For both the full set and locomotion the highest **SI** values were  
228 observed either in the early or intermediate epoch of the response. We then set out to



229 quantify the overall change in specificity. Compared with locomotion, the full set provided an  
230 overall ~40% increase in **SI** over chance levels (**Fig. 3D**;  $p = 0$ , sign-test,  $n = 516$  trials).

231

232 To further test our conclusion that a higher dimensional description of behaviour revealed  
233 increased stimulus-response specificity, we asked whether it improved our ability to predict  
234 the stimulus class based upon a mouse's behaviour (i.e. whether higher dimensionality  
235 enables more accurate decoding of the stimulus). To this end, we applied a K-Nearest  
236 Neighbours (KNN) classifier since this algorithm utilizes that local information provided by the  
237  $k$  neighbours and therefore represents a natural extension of the specificity analysis (see  
238 **STAR Methods** section **Decoding analysis** for details). Like the **SI** index, KNN decoding  
239 performances depended on the choice of  $k$  and  $d$ . Differently to what we observed for **SI**,  
240 where the index was maximized for  $k = 1$ , the best performances were obtained for larger  
241 values of  $k$  indicating that multiple neighbours are required to reduce noise (**Fig. S6A**).  
242 Similarly to **SI** analyses, high dimensional responses substantially improved accuracy (**Fig.**  
243 **S6B**).

244 Decoding performances were not significantly different for the full set and for locomotion  
245 when comparing flash vs loom (**Fig. 4A**, black dots,  $p = 0.1130, 0.1384, 0.6013$  for 0-1s, 1-2s,  
246 2-3s epochs, binomial test,  $n = 344$  trials). However the full set improved decoding of the early  
247 response for flash vs sound (**Fig. 4A**, red dots,  $p = 0, 0.5356, 0.26$  for 0-1s, 1-2s, 2-3s epochs,  
248 binomial test,  $n = 344$  trials) and across all epochs for loom vs sound (**Fig. 4A**, blue dots,  $p =$   
249  $0.0008, 0, 0.0028$  for 0-1s, 1-2s, 2-3s epochs, binomial test,  $n = 344$  trials). These results were  
250 not specific for the KNN classifier since matching outcomes were obtained by using Random  
251 Forest (**Fig. S6C**; flash vs loom:  $p = 0.4218, 0.2146, 0.3671$ ; flash vs sound:  $0, 0.7528, 0.5550$ ;  
252 loom vs sound:  $0, 0, 0.0057$ , binomial tests,  $n = 344$  trials). Focussing on the most informative  
253 0-2s epoch enabled to decode flash vs loom and flash vs sound with over 90% accuracy  
254 (respectively 93% and 91.73%, **Fig. 4B**, black and red bars) and the full set did not provide  
255 significant improvements over locomotion ( $p = 0.4901, 0.1186$ , binomial test,  $n = 516$  trials).  
256 However, when comparing loom vs sound, locomotion only allowed 66.78% accuracy while  
257 the full set provided 77.75% accuracy, a 65% improvement over chance level ( $p = 0.00001$ ,  
258 binomial test,  $n = 516$  trials). The full set also provided a 20.57% improvement over chance  
259 level when decoding was performed across the three stimuli (**Fig. 4C**, purple bar,  $p = 0.0001$ ,  
260 binomial test,  $n = 516$  trials), which corresponded to an additional ~40 correctly decoded  
261 trials. Part of the increase in performance was granted by the information provided by  
262 changes in body shape (described in **Fig. 1D** as Body Elongation, Body Bend,  $\Delta$ Body Elongation,  
263  $\Delta$ Body Bend) since removing those dimensions from the full set significantly degraded  
264 decoding performances (**Fig. 4C**, dark purple bar;  $p = 0.0125$ , binomial test,  $n = 516$  trials).

265

### 266 ***Higher dimensionality reveals a larger set of defensive behaviours***

267 Our results indicate that the mapping between stimulus and behavioural response is more  
268 specific in a higher dimensional space. We next sought to describe the structure of this  
269 mapping. Specifically, we asked how many distinct behaviours are expressed in response to  
270 each stimulus. First, we clustered responses from all trials based upon similarity in motor  
271 actions. An important consideration in such a process is how many clusters to allow. We  
272 approached that problem by investigating the relationship between the number of clusters  
273 and the degree to which each cluster was restricted to a single stimulus (quantified as Mutual  
274 Information between stimulus and behavioural response). We focussed on the interval 0-2s

275 since this epoch provided the best decoding results. Then, for each number of clusters, we  
276 estimated the Mutual Information (**MI**) between stimulus and behavioural response (see  
277 **STAR Methods** section **Clustering and Information Analysis** for details). By observing the  
278 increase in **MI** as function of the number of clusters two distinct regions could be clearly  
279 delineated (**Fig. 5A**, black error bars). For a small number of clusters, approximately between  
280 2 and 7, we observed a “high gain” region where **MI** increases substantially for each additional  
281 cluster. Beyond this domain the “high gain” region was replaced by a “low gain” region where  
282 further increments in the number of clusters provided limited increments in **MI**. This analysis  
283 suggests 7 clusters as a reasonable trade-off between the need for a generalization of the  
284 behavioural responses and the granularity required to capture a large fraction of stimulus  
285 specific information.

286 Our previous analyses suggested that the range of behaviours is larger when considering the  
287 full set vs. locomotion alone (see e.g. **Fig. 3A**). To confirm that this was true, we applied the  
288 same clustering method to the locomotion data alone. A similar repartition into high and low  
289 gain regions was observed (**Fig. 5B**, black error bars). However, the high gain region domain  
290 appeared to be reduced to approximately 2-3 clusters suggesting a reduction in the number  
291 of sensory specific behavioural clusters. To more rigorously test whether this was the case  
292 we fitted the relation between **MI** and the number of clusters  $k$  using the function

293

$$MI(k) = a \left( 1 - e^{-\frac{k}{\tau}} \right) + bk \quad (2)$$

294 which incorporates a steep exponential component and a more gradual linear component  
295 (**Fig. 5A&B**, fitting lines; see **STAR Methods** section **Clustering and Information Analysis** for  
296 details). These terms account respectively for the high and the low domain regions. We then  
297 used the exponential rise constant  $\tau$  as a measure of the size of the high domain region. We  
298 found that  $\tau$  was indeed smaller for locomotion alone (**Fig. 5C**) indicating that the full set of  
299 measures of postures and movements captures a larger number of sensory specific  
300 behaviours.

301 Among the 7 behaviours revealed by our clustering of the full set several motifs occurred (**Fig.**  
302 **5D**). Fast sustained locomotion (cluster #1) or rearing (cluster #2) both accompanied by body  
303 elongation; Body bending followed by delayed freeze (cluster #3); Sustained freeze (cluster  
304 #4); Transient freeze in rearing position (cluster #5); Body bending and other rotations of the  
305 body axis, including frequent changes in rearing position (cluster #6); Sustained freeze in body  
306 bent positions (cluster #7). The Flash stimulus evoked behaviours that were very specific for  
307 this stimulus (cluster #1 and #2; **Fig. 5E**, left panel). The Loom and Sound stimuli evoked  
308 approximately the same set of behaviours but, between the two stimulus classes, those  
309 behaviours were expressed in different proportions (**Fig. 5E**, middle and left panel).

310

### 311 ***Distinct behaviours differ both in rate and latency of behavioural primitives***

312

313 Each of those 7 behaviours was composed of several basic motor actions and postures that  
314 we define as primitives. In principle, distinct behaviours could contain diverse sets of  
315 primitives and/or the same set of primitives but expressed at different latencies from the  
316 stimulus onset. To better understand the composition of each behaviour we increased the  
317 temporal resolution of our behavioural analysis by subdividing the 2 seconds window into  
318 consecutive sub-second epochs. We then performed a clustering analysis across those sub-



319 second epochs to identify the primitives. In order to select the number of primitives and their  
320 duration we used a decoding approach. Thus, for each parameter combination, we fitted  
321 three stimulus-specific Variable-order Markov Models (VMMs), one for each stimulus class  
322 (see **STAR Methods** section **Analysis of Behavioural Primitives** for details). Decoding  
323 performances were then evaluated on hold out data by assigning each trial to the stimulus-  
324 specific VMMs associated with the highest likelihood. The VMMs cross-validated  
325 performances were optimal for primitive duration between 0.13 and 0.33 seconds (**Fig. S7A**).  
326 Within this range the best VMMs contained 6-8 primitives and exhibited maximum Markov  
327 order of 0-1 time steps (**Fig. S7B**). We selected VMMs with 8 primitives of 0.13s duration (**Fig.**  
328 **6A,B**) and we used them to compare, across the 7 behaviours, the rate and the latency of the  
329 primitives. For each stimulus the distribution of primitives was significantly different from that  
330 observed during the spontaneous behaviour preceding the stimulus (**Fig. S7C**;  $p = 0, 0, 0$ ,  
331 Pearson's  $\chi^2$  test for flash, loom and sound). For flash the two most frequently occurring  
332 primitives defined the responses to cluster #1 and #2 in **Fig. 5D** and represented respectively  
333 run and rear actions (**Fig. 6B**). For loom and sound the most frequent primitives were both  
334 expression of freezing but along different postures: with straight elongated body for loom  
335 (**Fig.6B, freeze straight**) and with hunched and left or right bent body for sound (**Fig. 6B,**  
336 **freeze bent**). Both the latency and the rate of those primitives changed significantly across  
337 the 7 behaviours (**Fig. 6C**; rate:  $p = 0, 0, 0, 0$ ; latency  $p = 0, 0, 0.0014, 0$ ; Kruskal-Wallis One-  
338 Way ANOVA for run, rear, freeze straight and freeze bent). These results indicate that both  
339 the composition and the timing of basic motor actions and postures varies in those  
340 behaviours.

341

### 342 ***The mapping between stimulus and response is not uniquely defined by observable*** 343 ***initial conditions***

344

345 From the results in **Fig. 5** a clear “one-to-many” mapping emerges in which each stimulus can  
346 evoke multiple behavioural responses. Such multiplicity could be driven by several factors  
347 preceding the time of the stimulus onset and dynamically reconfiguring the mapping between  
348 stimulus and response: internal states of the animal that are independent from the stimuli  
349 and ongoing observable behaviours; variable postures and motor states that mechanically  
350 constrain the range of possible behavioural responses; variable position of eyes and ears  
351 within the behavioural arena that modify the way the same stimulus is perceived across trials.

352

353 We first set out to explore the effect of ongoing posture and motor state (hereafter for  
354 simplicity referred to as ongoing activity). We tested the hypothesis that, given a particular  
355 stimulus, the ongoing activity uniquely defined the subsequent behavioural response. To this  
356 end, we first performed a clustering analysis on the epochs immediately preceding stimulus  
357 onset (duration = 0.5s). Each cluster identified different ongoing activities and the number of  
358 clusters was predefined and equal to 7 in order to match the cardinality of the response  
359 clusters (**Fig. 7A**). If ongoing activities were to uniquely define the response we would expect  
360 a “one-to-one” mapping. We found this not to be the case. Consistently with the “one-to-  
361 many” mapping previously described, each ongoing activity cluster led to multiple responses  
362 (**Fig. 7B**). To quantify the dependence of response from ongoing activity we used Mutual  
363 Information (**MI**). We found that ongoing activity could only account for a small fraction of  
364 the **MI** required to optimally predict the responses (14.92% flash, 7.2% loom, 4.77% sound).

365

366 A caveat of this analysis lies in the fact that the multiplicity of responses might trivially arise  
367 from the hard boundaries imposed by the clustering procedure. Thus high dimensional points,  
368 representing either ongoing activities or responses, located near the boundaries between two  
369 or more clusters would still be assigned to one cluster only. To address the possibility that a  
370 “one-to-many” mapping simply arises from trials whose cluster membership is weakly defined  
371 we developed a procedure to remove such trials (see **STAR Methods** section **Clustering**  
372 **Refinement**). By removing an increasing number of trials the overall goodness of clustering  
373 increased both for ongoing activities and responses (**Fig. S7D,E**). In this reduced dataset (293  
374 trials, out of 516), individual clusters of ongoing activities still led to multiple responses (**Fig.**  
375 **S7F,G**) and only accounted for a small fraction of the **MI** required for correct prediction of the  
376 response cluster (11.92% flash, 9.01% loom, 4.85% sound) indicating that the “one-to-many”  
377 mapping was robust to clustering errors.

378  
379 We then set out to investigate the effect of the position of eyes and ears at the time of  
380 stimulus onset (hereafter simply referred to as initial position). We quantified initial positions  
381 by measuring 5 dimensions: head orientation (elevation and azimuth, **Fig.7C**) and the head X-  
382 Y-Z position. All these dimensions were calculated in allocentric coordinates in respect to the  
383 centre of the arena (see **STAR Methods** section **Estimating the Effects of Initial Positions**).  
384 Since all our measures of movements and postures are instead expressed in egocentric  
385 coordinates it is not clear how to connect these two coordinate systems. For example it is  
386 possible that initial positions distant from each other in X-Y coordinates but well matched  
387 after a rotation around the Z axis would provide more (or less) similar responses than initial  
388 positions closer to each other in X-Y coordinates but with poor rotational symmetry (**Fig.7D**).  
389 In order to avoid any assumption about the mapping between egocentric responses and  
390 allocentric coordinates we developed a systematic method to extrapolate the effect of initial  
391 conditions on behavioural responses. Our method relies on the fact that, in the limit of an  
392 infinite number of partitions in the space of initial conditions, a “one-to-one” mapping  
393 between initial conditions and behavioural responses, if present, will always enable a correct  
394 prediction of the response cluster from the initial condition. To test for this possibility we  
395 systematically increased the number of partitions (see example partitions in **Fig.7E**) and each  
396 time we calculated the **MI** between the initial conditions and the response clusters (see dots  
397 black, blue and red dots in **Fig.7F**). We then used linear extrapolation to estimate the **MI** in  
398 the limit of an infinite number of partitions clusters (see dots black, blue and red lines in  
399 **Fig.7F**; see **STAR Methods** section **Estimating the Effects of Initial Positions**). We found that  
400 initial positions only accounted for a minority of the **MI** required for correct prediction of the  
401 response cluster (18.76% flash, 10.06% loom, 5.46% sound). Similar results were obtained  
402 after removal of 50% of the trials for which the cluster membership for the responses was  
403 weakly defined (14.53% flash, 8.46% loom, 8.99% sound). In principle it possible that our  
404 linear extrapolation substantially underestimates the information conveyed by initial  
405 conditions. However, when the order of the trials for initial conditions and response clusters  
406 were separately re-organized to maximize their match, our extrapolation of the **MI** well  
407 captured the entropy of the response clusters (92.68%, 95%, 93.03% of entropy for flash,  
408 loom and sound; **Fig.7F**, grey dots and lines). This indicates that our extrapolation could  
409 capture a “one-to-one” mapping between initial conditions and behavioural responses but  
410 such mapping was not present in the data.

## 411 Discussion

412

413 A fundamental goal of neuroscience is to link neural circuits to behaviours. Two unescapable  
414 tasks are essential prerequisites for approaching this problem: the generation of a detailed  
415 anatomical and physiological description of brain circuits – the neural repertoire – and the  
416 charting of all the relevant behaviours exhibited by the model organism of choice – the  
417 behavioural repertoire. Then, in order to uncover meaningful links, the resolutions of the  
418 neural and the behaviour repertoires have to match, since a high resolution on one side can't  
419 compensate for low resolution on the other [15].

420 In the last decade enormous advances have been made in understanding functional and  
421 anatomical connectivity of the CNS [16-18]. Thanks to these techniques a detailed sketching  
422 of the neural repertoire underlying sensory guided defensive behaviours in the mouse is in  
423 process and substantial advances have been made in the last few years [6, 9, 19-22].

424 High dimensional reconstruction of rodent behaviour is now starting to catch up (see e.g. [23,  
425 24] for comprehensive reviews). Such reconstructions have been first developed for  
426 constrained situations (e.g. treadmill walk) and by applying physical markers to detect body  
427 landmarks [25]. More recently, machine learning [26-28] and deep-learning [29-31] have  
428 allowed to obviate for the need to use physical markers. Alternative approaches have also  
429 been taken by using depth cameras [32] or by combining traditional video with head mounted  
430 sensors to measure head movements [33] and even eye movements and pupil constriction  
431 [34]. In spite of these advancements, the behavioural repertoire for defensive behaviours has  
432 so far only been quantified by measuring changes in locomotion state.

433 The first aim of this work was to provide a higher resolution map of sensory guided  
434 behaviours. To achieve this aim we used four cameras that allowed us to triangulate 2D body  
435 landmarks and obtain a 3D reconstruction of the mouse body. The accuracy of such a  
436 reconstruction was substantially improved by training 3D Statistical Shape Model that we  
437 used to correct the 3D coordinates (**Fig. S2**). Our approach is supervised in that it requires to  
438 pre-specify a set of body landmarks (nose, ears, neck base, body centre and tail base; see **Fig.**  
439 **1A**). Previous approaches to perform a mouse 3D reconstruction, realized by using a depth  
440 camera, took instead an unsupervised approach using all body points in the images followed  
441 by dimensionality reduction [32, 35]. The main advantage of our supervised approach relies  
442 in the fact that the poses are easier to interpret. For example, a mouse looking up can be  
443 easily described by a change in nose elevation in respect to the neck base. The main  
444 disadvantage is represented by the potential errors in 3D reconstruction arising from  
445 incorrect tracking of body landmarks. However, reconstruction errors can be minimized by  
446 using multiple camera views and Statistical Shape Models and this approach is easily scalable  
447 to any number of views.

448 Our first main finding was that the level of stimulus-response specificity provided by a high  
449 dimensional description of mouse behaviour is higher than the specificity measured with  
450 locomotion alone (**Fig.3,4**). This increase in specificity was particularly remarkable when  
451 comparing behavioural responses to a loud sound and a visual looming. It has been previously  
452 shown that both stimuli induce escape to a shelter or freeze when the shelter is not present  
453 [7, 36]. As a result the responses to these stimuli have been considered equivalent and no  
454 attempts have been made to differentiate them. Here we show that looming and sound  
455 responses can be discriminated with ~78% accuracy (**Fig. 4**). This result can be explained by  
456 the fact that a higher dimensional behavioural quantification revealed a larger number of  
457 distinct behaviours that are stimulus-specific. Thus for both looming and sound the animals

458 typically froze but they did so according to two different postures: a straight, upward-looking  
459 pose for loom (Fig. 3A and cluster #4 in Fig. 5, 6) and a hunched pose for sound often preceded  
460 by a body spin (Fig. 3A and cluster #3 in Fig. 5, 6). Moreover, in several trials a looming  
461 stimulus was more likely than sound to elicit rearing or short lasting freeze in rearing position  
462 (clusters #2 and #5 in Fig. 5, 6).

463 In locomotion data, where this diversity was lost (Fig. 5), specificity for looming and sound  
464 was substantially reduced (Fig. 4). Linking the neural repertoire to the behavioural repertoire  
465 based on locomotion alone would indicate almost perfect convergence – different sensory  
466 processes ultimately lead to only one single action. Instead, by increasing the resolution of  
467 the behavioural repertoire, we were able to reject the convergence hypothesis showing that  
468 behavioural outputs preserve a significant level of stimulus specificity.

469 For other pairs of stimuli, such as flash vs loom, locomotion alone granted a good level of  
470 discrimination ( $\approx 90\%$  accuracy, Fig. 4). A higher dimensional quantification of postures and  
471 movements did not provide substantial advantages in discriminating between such stimuli  
472 but enabled to better describe behavioural responses. Therefore, while locomotion data  
473 could well differentiate a response to a flash as opposed to a looming stimulus, a higher  
474 dimensional quantification could tell us whether the animal was rearing or running (clusters  
475 #1 and #2 in Fig. 5,6).

476 Our second main finding was a “one-to-many” mapping between stimulus and response. Thus  
477 a high dimensional description revealed at least seven behavioural responses and each  
478 stimulus could evoke at least three (Fig. 5). The same analysis on locomotion data identified  
479 only two behaviours across all stimuli (Fig. 5B&C). The reduced, essentially binary, mapping  
480 between stimulus and response is consistent with previous results that employed locomotion  
481 as unique behavioural descriptor. In absence of shelter a looming stimulation was shown to  
482 evoke either immediate freeze or escape followed by freeze [9]. When a shelter was present  
483 a dark sweeping object typically evoked a freeze but flight was also observed in a smaller  
484 number of trials [5]. Our higher dimensional descriptors provide a substantially enhanced  
485 picture of this phenomenon and indicate that the one-to-many mapping between stimulus  
486 and response occurs robustly across different sensory stimuli.

487 The overall figure of seven distinct behaviours represents a conservative estimate and reflects  
488 the criterion we used to define the granularity of our behavioural classification. Previous  
489 studies, aimed at providing an exhaustive description of spontaneous behaviours, identified  
490 of  $\sim 60$  distinct classes in the mouse [32] and  $\sim 100$  in fruit-fly [28]. The smaller set of  
491 behaviours identified in this study, although more tractable and still sufficient for capturing  
492 stimulus-response specificity, likely underestimates the repertoire of mouse defensive  
493 actions.

494 The “one-to-many” mapping we described could not be trivially explained by different initial  
495 conditions, i.e. by the variety of postures and motor states or by the position of eyes and ears  
496 at the time of stimulus presentation (Fig. 7). This is consistent with recent results in drosophila  
497 where ongoing behaviour had statistically significant but not deterministic effects on future  
498 behaviours [37] and on responses to optogenetic stimulation of descending neurons [38].  
499 Therefore, at least to some extent, the “one-to-many” mapping reflects stimulus-  
500 independent variability in the internal state of the animal that generates diversity in the  
501 behavioural output. Variability in the internal states could take many forms ranging from  
502 noise in the neuronal encoding of the stimuli along the visual and auditory pathways [39] to  
503 fluctuating levels of arousal [40, 41] or anxiety [42] and further studies will be required to  
504 discriminate among those contributions. The high level of functional degeneracy in neuronal

505 networks (see e.g. [43-45]) provides the suitable substrate for the observed behavioural  
506 diversity. The presence of functional degeneracy is consistent with recent studies reporting  
507 that the expression of defensive responses can be affected by activation of multiple neuronal  
508 pathways [9, 10, 46-50]. However our current understanding of the anatomical and functional  
509 substrates of this diversity is still insufficient and limited to the locomotion phenotype. We  
510 believe that further investigations of such substrates, matched with a more detailed  
511 description of defensive behaviours, represent an important avenue for future studies.  
512

513 **Acknowledgements**

514

515 This study was funded by a David Sainsbury Fellowship from National Centre for Replacement,  
516 Refinement and Reduction of Animals in Research (NC3Rs) to R.S. (NC/P001505/1) and by an  
517 MRC grant to R.J.L. (MR/N012992/1).

518

519 **Author Contributions**

520

521 Conceptualisation, R.S. and R.J.L.; Methodology, R.S., A.G.Z. and T.F.C.; Formal analysis, R.S.,  
522 A.A. and A.G.Z.; Investigation, R.S. and N.M.; Writing, R.S., N.M., A.E.A. and R.J.L.; Funding  
523 Acquisition, R.S. and R.J.L.

524

525 **Declaration of Interests**

526

527 The authors declare no competing interests.



528 **Main Text Figures**

529

530

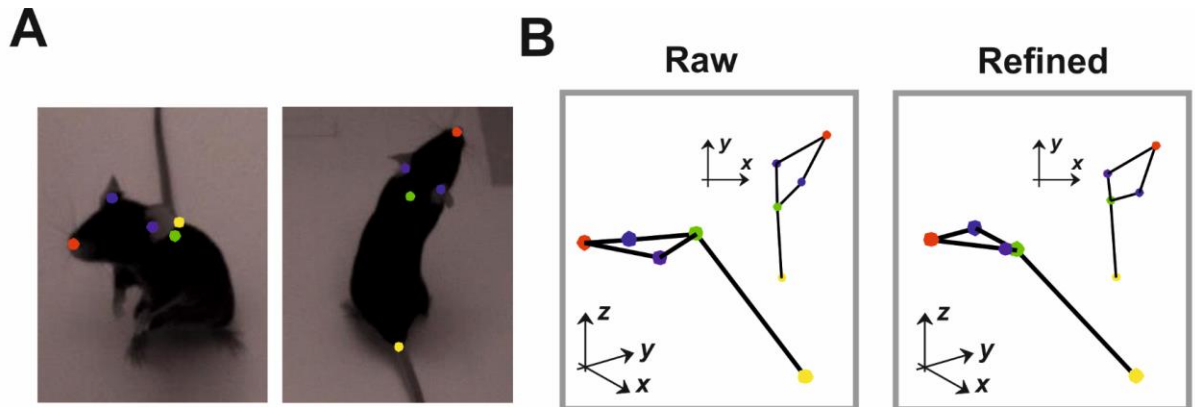

**C**

$$X(t) = (\bar{X} + \sum P_i b_i(t)) R(t) + T(t)$$

←-----→      ←-----→  
Body Shape      Body Position

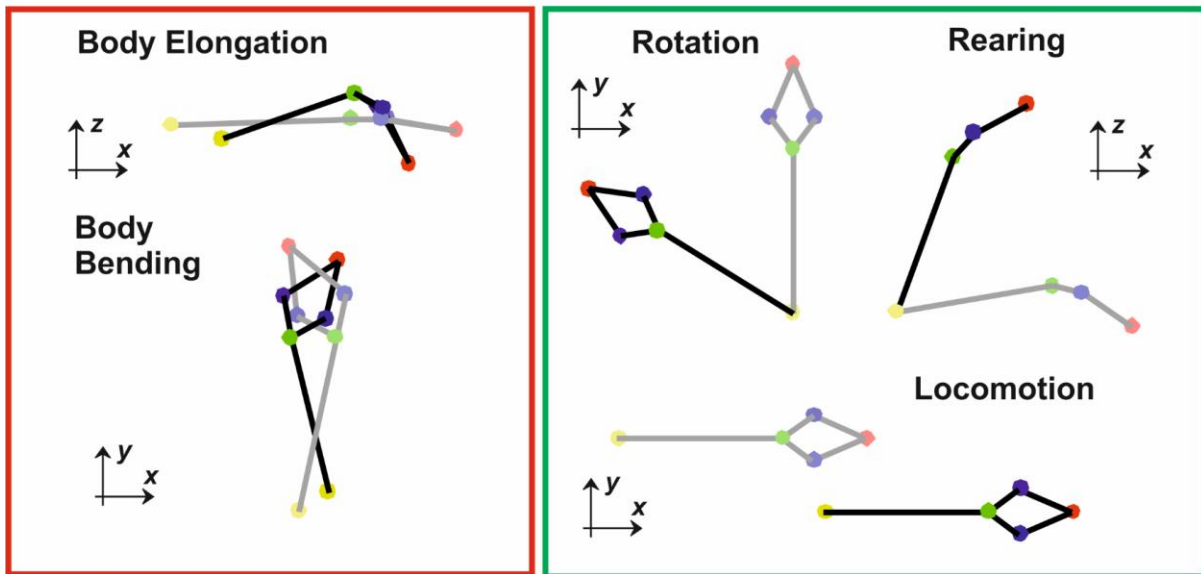

**D**

**Postural Measures:**

$$Rear(t) = z_{neck}(t) - z_{tail}(t) *$$

$$Body\ Elongation(t) = b_1(t)$$

$$Body\ Bend(t) = |b_2(t)|$$

(\*)  $z_{neck}$  and  $z_{tail}$  correspond to  $z$  coordinates of neck and tail

(\*\*)  $dt = 0.067$  seconds

(\*\*\*) Frobenius Distance

**Movement Measures: \*\***

$$Locomotion(t) = |T(t) - T(t-dt)| ***$$

$$Freeze(t) = -|X(t) - X(t-dt)| ***$$

$$\Delta Rearing(t) = Rear(t) - Rear(t-dt)$$

$$Body\ Rotation = |R(t) - R(t-dt)| ***$$

$$\Delta Body\ Elongation(t) = b_1(t) - b_1(t-dt)$$

$$\Delta Body\ Bend(t) = |b_2(t) - b_2(t-dt)|$$

531

532 **Figure 1: Reconstruction of mouse poses and quantification of postures and movements. A)**

533 Body landmarks are separately tracked across each camera. **B)** A raw 3D reconstruction is

534 obtained by triangulation of body landmark positions (left panel). The raw reconstruction is

535 corrected by applying our algorithm based on the Statistical Shape Model as described in

536 Methods. The refined 3D reconstruction (right panel) is then used for all the further analyses.

537 **C)** The model expressed by equation 1 allows for quantifying a wide range of postures and

538 movements of which red and green boxes report some examples. The “Body Shape”

539 components enable to measure changes in body shape such as body elongation and body

540 bending. The “Body Position” components enables to quantify translations and rotations in a

541 3D space. **D)** The full set of behavioural measures, divided into 3 postural measures and 6

542 movement measures is expressed as function of the terms in equation 1.

543

544

**A**

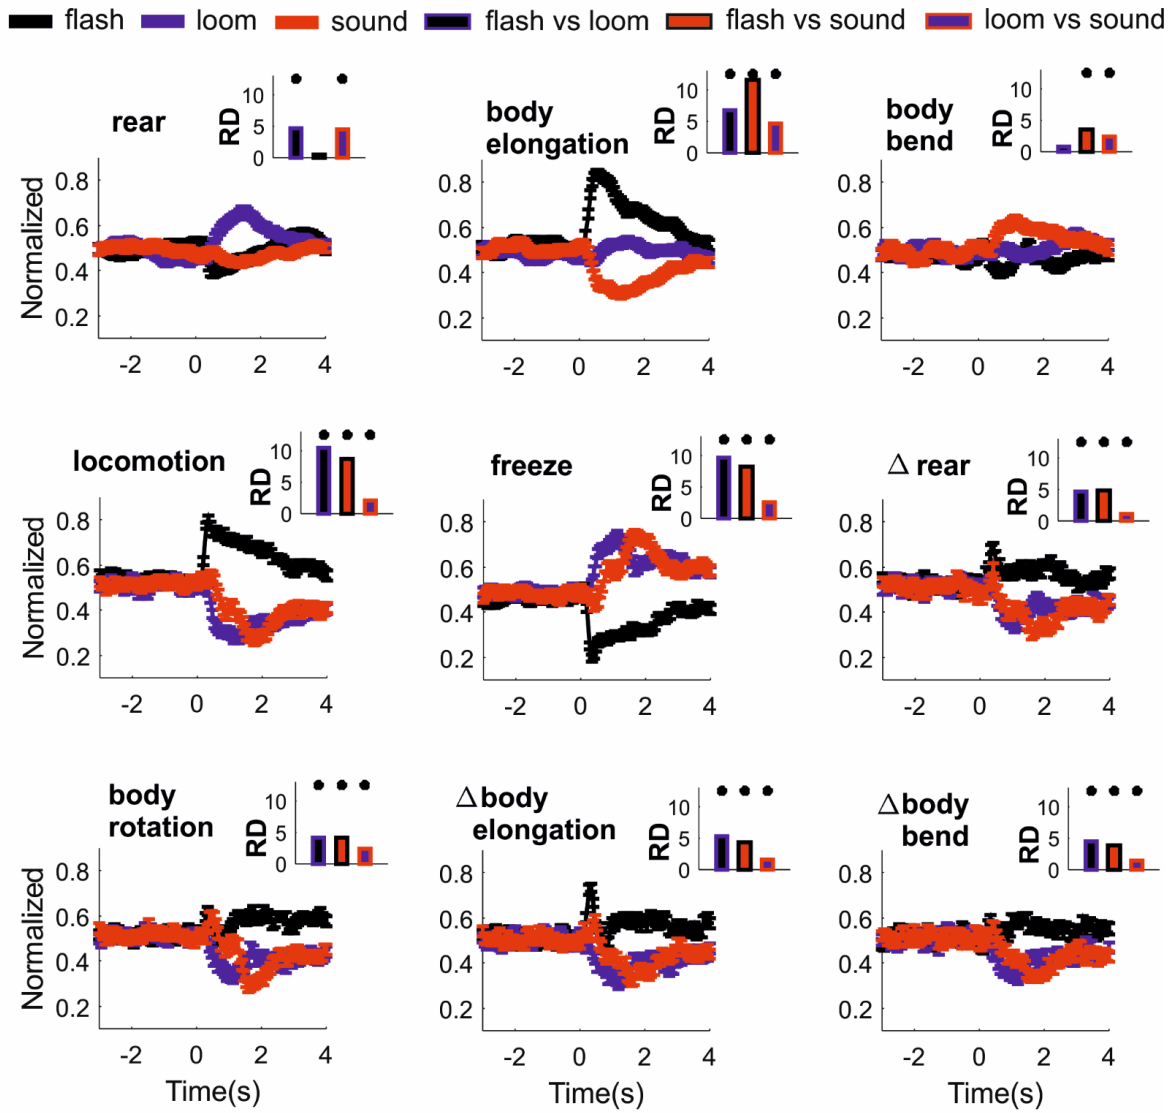

**B**

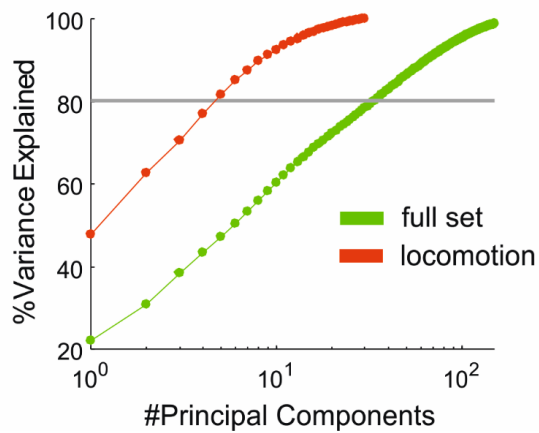

**C**

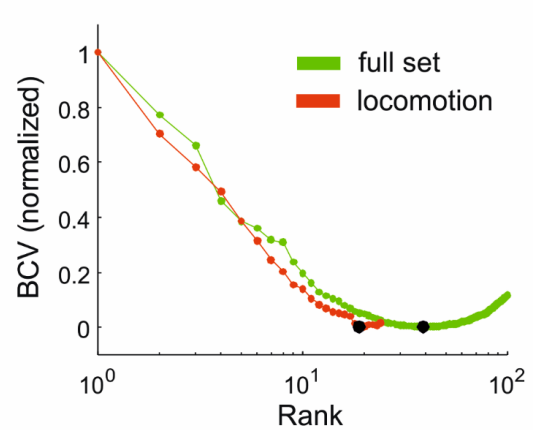

545

546

547 **Figure 2: Multiple motor actions are involved in sensory guided behaviours. A)** Average  
548 response to the three classes of sensory stimuli (flash, loom, sound) according to the postural  
549 and movement measures defined in **Fig. 1D**. Error bars represent SEM (n=172 for each  
550 stimulus class). Response divergence (RD) between pairs of stimuli is reported in insets (\*=  
551  $p < 0.001$  with shuffle test for RD). **B)** Percentage of variance explained as function of principal  
552 components for the full set of motor actions (green) and for locomotion only (red). The grey  
553 line indicates 80% explained variance. **C)** The minimum Bi-Cross Validation Error is used to  
554 quantify the rank of the full set and of locomotion only (respectively rank = 19 and 39, marked  
555 by black dots).

556

557

558

559

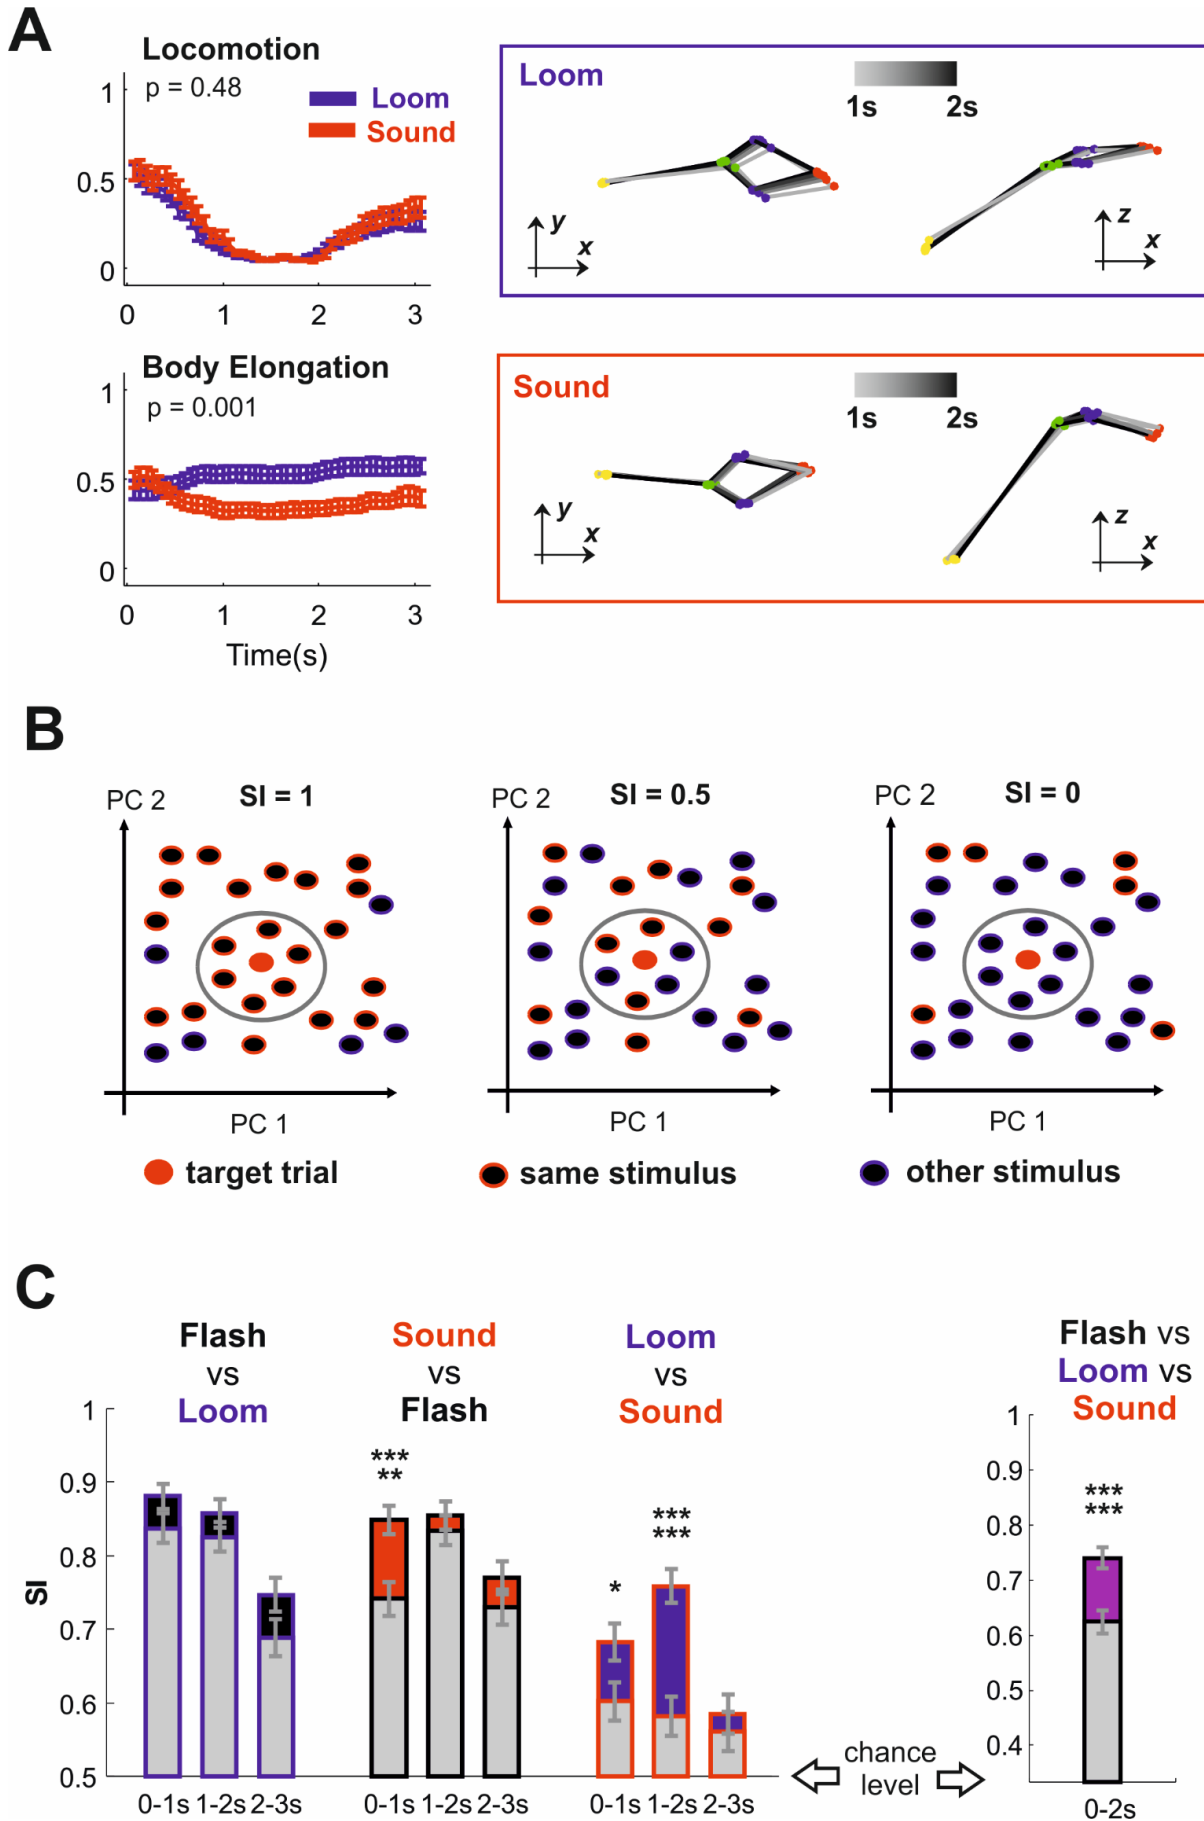

560  
561  
562  
563  
564  
565  
566  
567  
568  
569  
570  
571  
572  
573  
574  
575  
576  
577

**Figure 3: Higher dimensionality reveals increased-stimulus response specificity. A)** Loom and sound could evoke an indistinguishable pattern of locomotion arrest shown in upper left panel (mean±SEM; data from n = 37 and 31 trials for loom and sound). However the pattern of body elongation was different across loom and sound (bottom left panel). A representative trial for loom (blue box) and for sound (red box) are reported in the right panels. Time progression is captured by the gray-to-black transition of the mouse body (poses sampled every 0.2s between 1 and 2 seconds latency from stimulus onset). Note that different levels of body elongation can be observed from a side view in the z-x planes. **B)** On each trial the specificity index (**SI**) was calculated as the number of neighbour responses to the same stimulus divided by the total number of neighbours. In this toy example, based on two-dimensional responses (PC1 and PC2), we show a target trial for which the number of neighbouring responses for the same stimulus changes across panels to obtain SI values of 1, 0.5 and 0. **C)** Specificity Index for pairs of stimuli (mean±SD, n = 344 trials) measured with locomotion (grey bars) and for the full set (black, red, and blue). **D)** Same as **C** but for all stimuli (mean±SD, n = 516 trials). \*p<0.05, \*\*\*\*\* p < 0.0005, \*\*\*\*\* p < 0.0001.



578

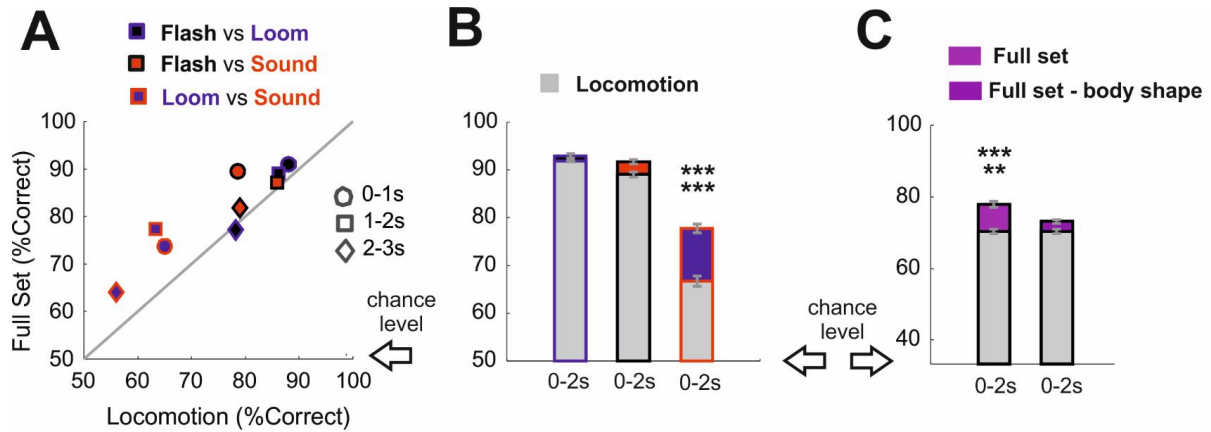

579

580 **Figure 4: Higher dimensionality improves stimulus decoding.** **A)** Comparison between K-  
581 Nearest Neighbour (KNN) decoding performances (mean±SD) based on the full set and on  
582 locomotion only. Pairwise comparisons are shown for flash vs loom (black-blue), sound vs  
583 flash (red-black) and loom vs sound (blue-red) across different response epochs (0-1s,  
584 1-2s, 2-3s). **B)** Decoding performances (mean±SD) of KNN decoding for 0-2s response epochs. **C)**  
585 Same as panel **B** but decoding is performed across all stimuli for the full set (bright purple)  
586 and for a reduced set in which we removed Body Elongation, Body Bending,  $\Delta$ Body Elongation  
587 and  $\Delta$ Body Bending (dark purple). Locomotion is always displayed as grey bars. \*\*\*\*\*  $p <$   
588 0.0005, \*\*\*\*\*  $p <$  0.0001.

589

590

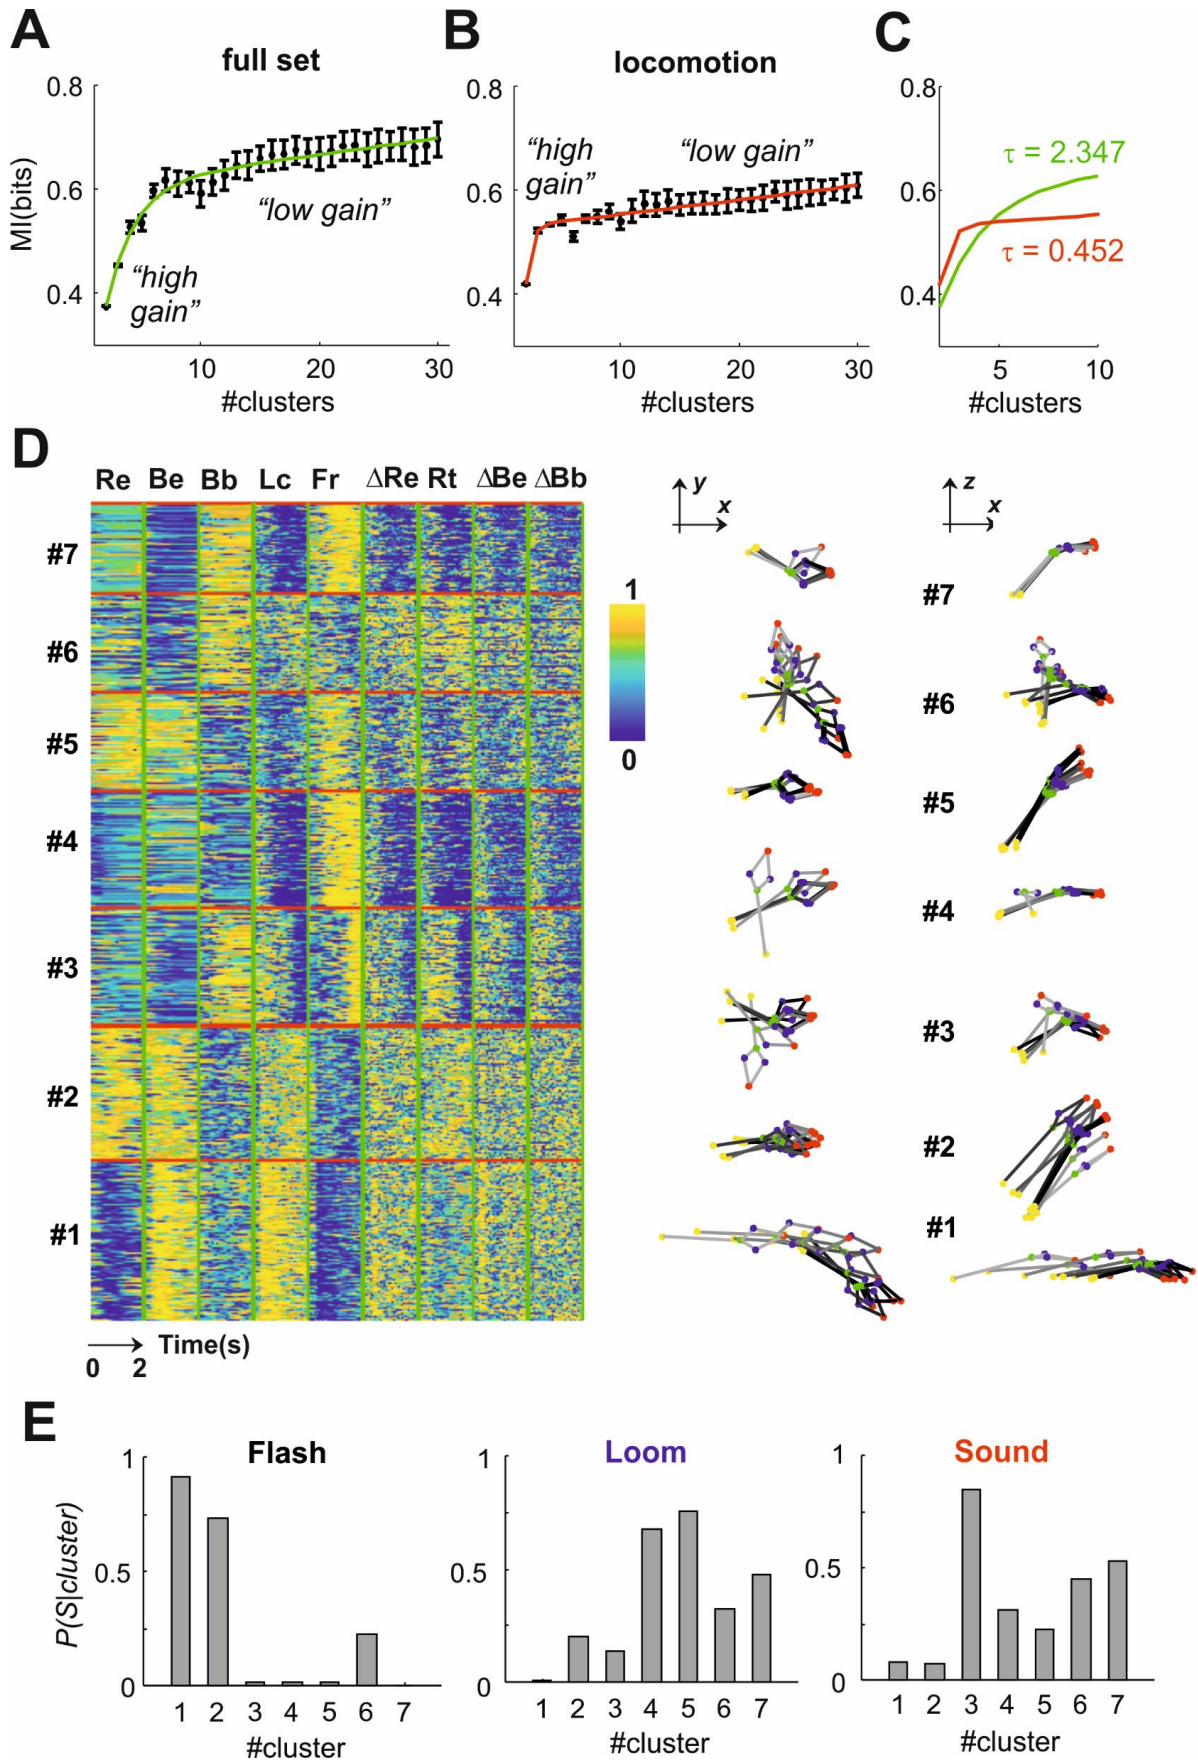

592  
593  
594  
595  
596  
597  
598  
599  
600  
601  
602  
603  
604  
605  
606  
607  
608  
609  
610  
611

**Figure 5: Higher dimensionality reveals a larger set of sensory specific behaviours. A)** Mutual information is estimated for the full set of motor actions as function of the number of clusters (mean $\pm$ SD, 50 repeats per cluster; at each repeat the best of 100 runs was selected). Note an initial fast rise in MI ("high gain" region in the plot) followed by a more gradual linear increase ("low gain" region). **B)** Same as panel **A** but for locomotion only. **C)** Comparison between the exponential rise in MI for the full set of motor actions and for locomotion only. The exponential rise in MI, captured by the  $\tau$  values, is slower for the full set indicating that the high gain domain encompasses a larger number of distinct clusters. **D)** Left panel shows the response matrix of the full dataset (n=516 trials) partitioned into 7 clusters. The response matrix is obtained by concatenating all the postures and motor actions (Re = Rear; Be = Body elongation; Bb = Body bend; Lc = Locomotion; Fr = Freeze;  $\Delta$ Re =  $\Delta$ Rear; Rt = Body rotation;  $\Delta$ Be =  $\Delta$ Body elongation;  $\Delta$ Bb =  $\Delta$ Body bend). Right panels shows one representative trial for each cluster (10 poses sampled at 0.2s intervals between 0 and 2s latency from stimulus onset; time progression is captured by the gray-to-black transition). **E)** Conditional probability of stimulus class, given each of the clusters shown in panel **D**. Flash, Loom and Sound are reported respectively in left, middle and right panel.

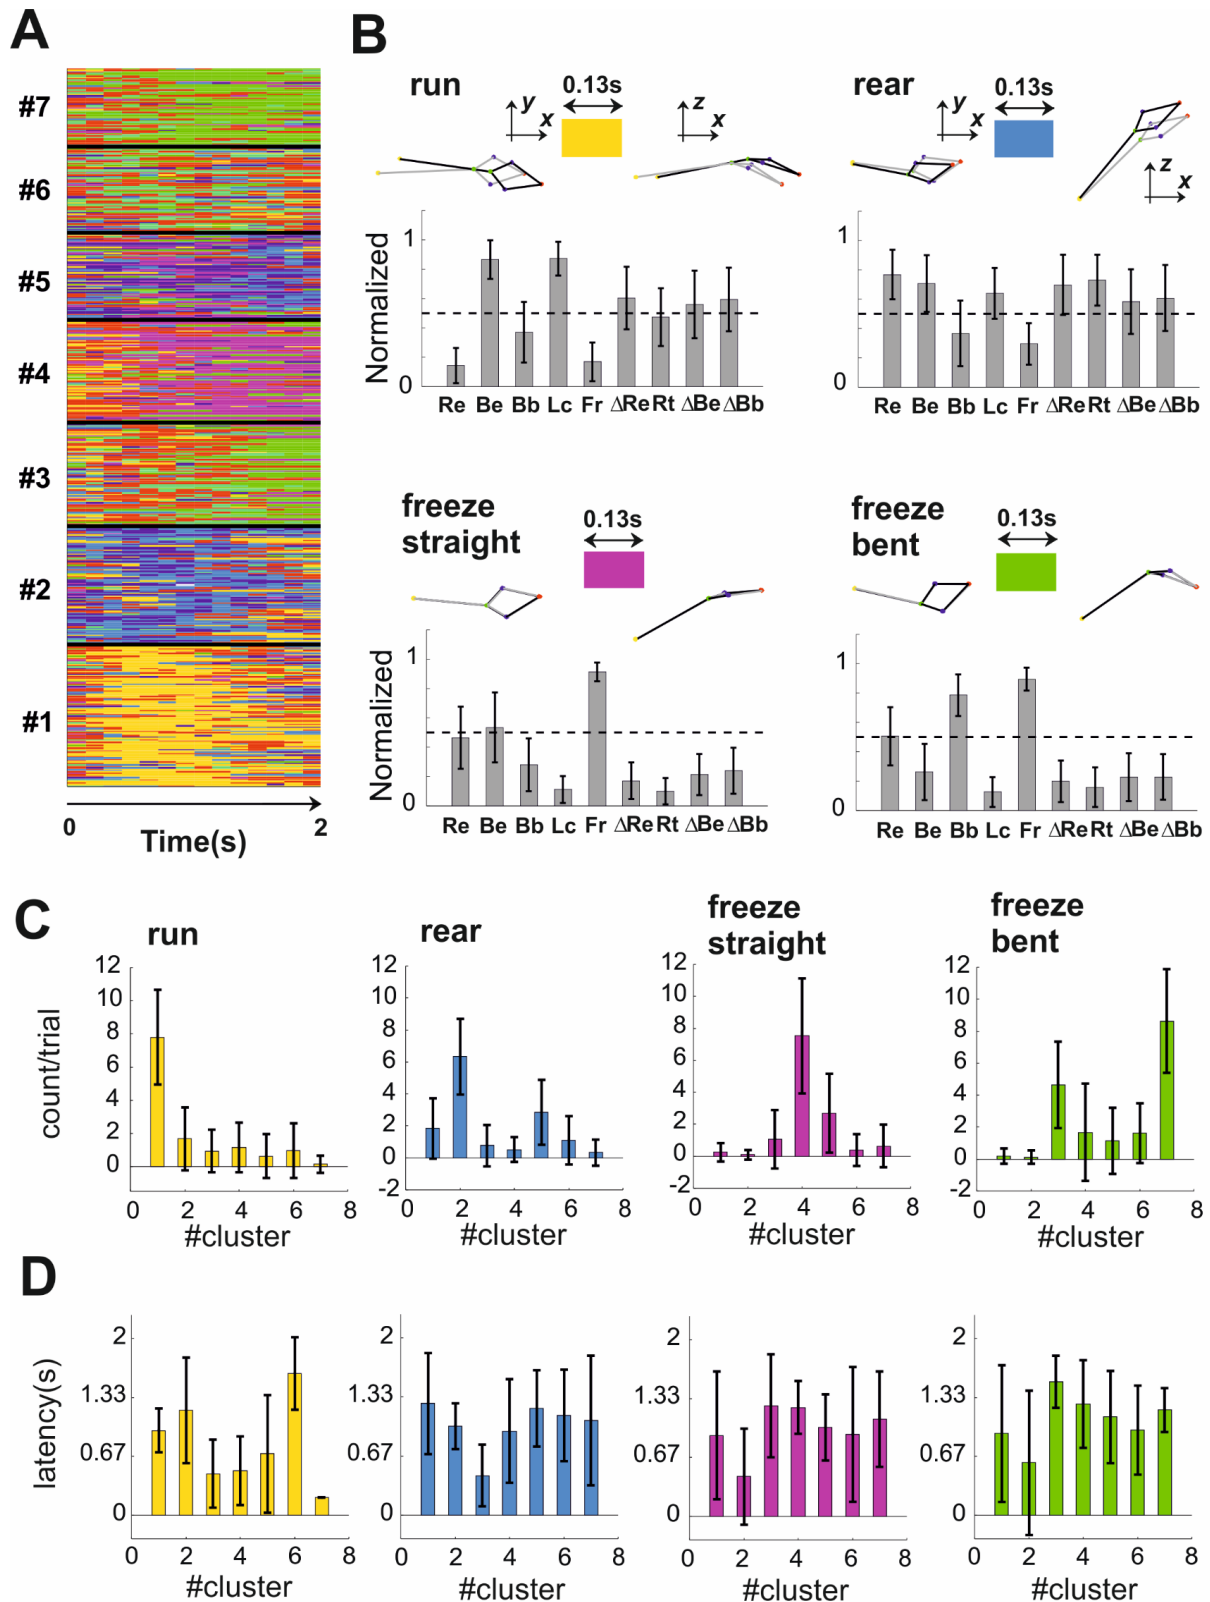

612

613

614

615

616 **Figure 6: Distinct behaviours differ both in rate and latency of behavioural primitives. A)**  
617 The primitives extracted from the response matrix are displayed for all trials (n = 8 primitives;  
618 duration = 0.133s). Trials are partitioned into the 7 clusters as in **Fig.5d**. **B)** The mean±SD of  
619 all measures of postures and movements are shown for four primitives (run, rear, freeze  
620 straight, freeze bent). Individual representative samples of each primitive are shown as 3D  
621 body reconstructions at the top of each bar graph. **C)** Frequency (mean±SD) of each primitive  
622 across the 7 behavioural clusters shown in **Fig. 5D**. **D)** Latency (mean±SD) of each primitive  
623 across the 7 behavioural clusters shown in **Fig. 5D**.  
624  
625

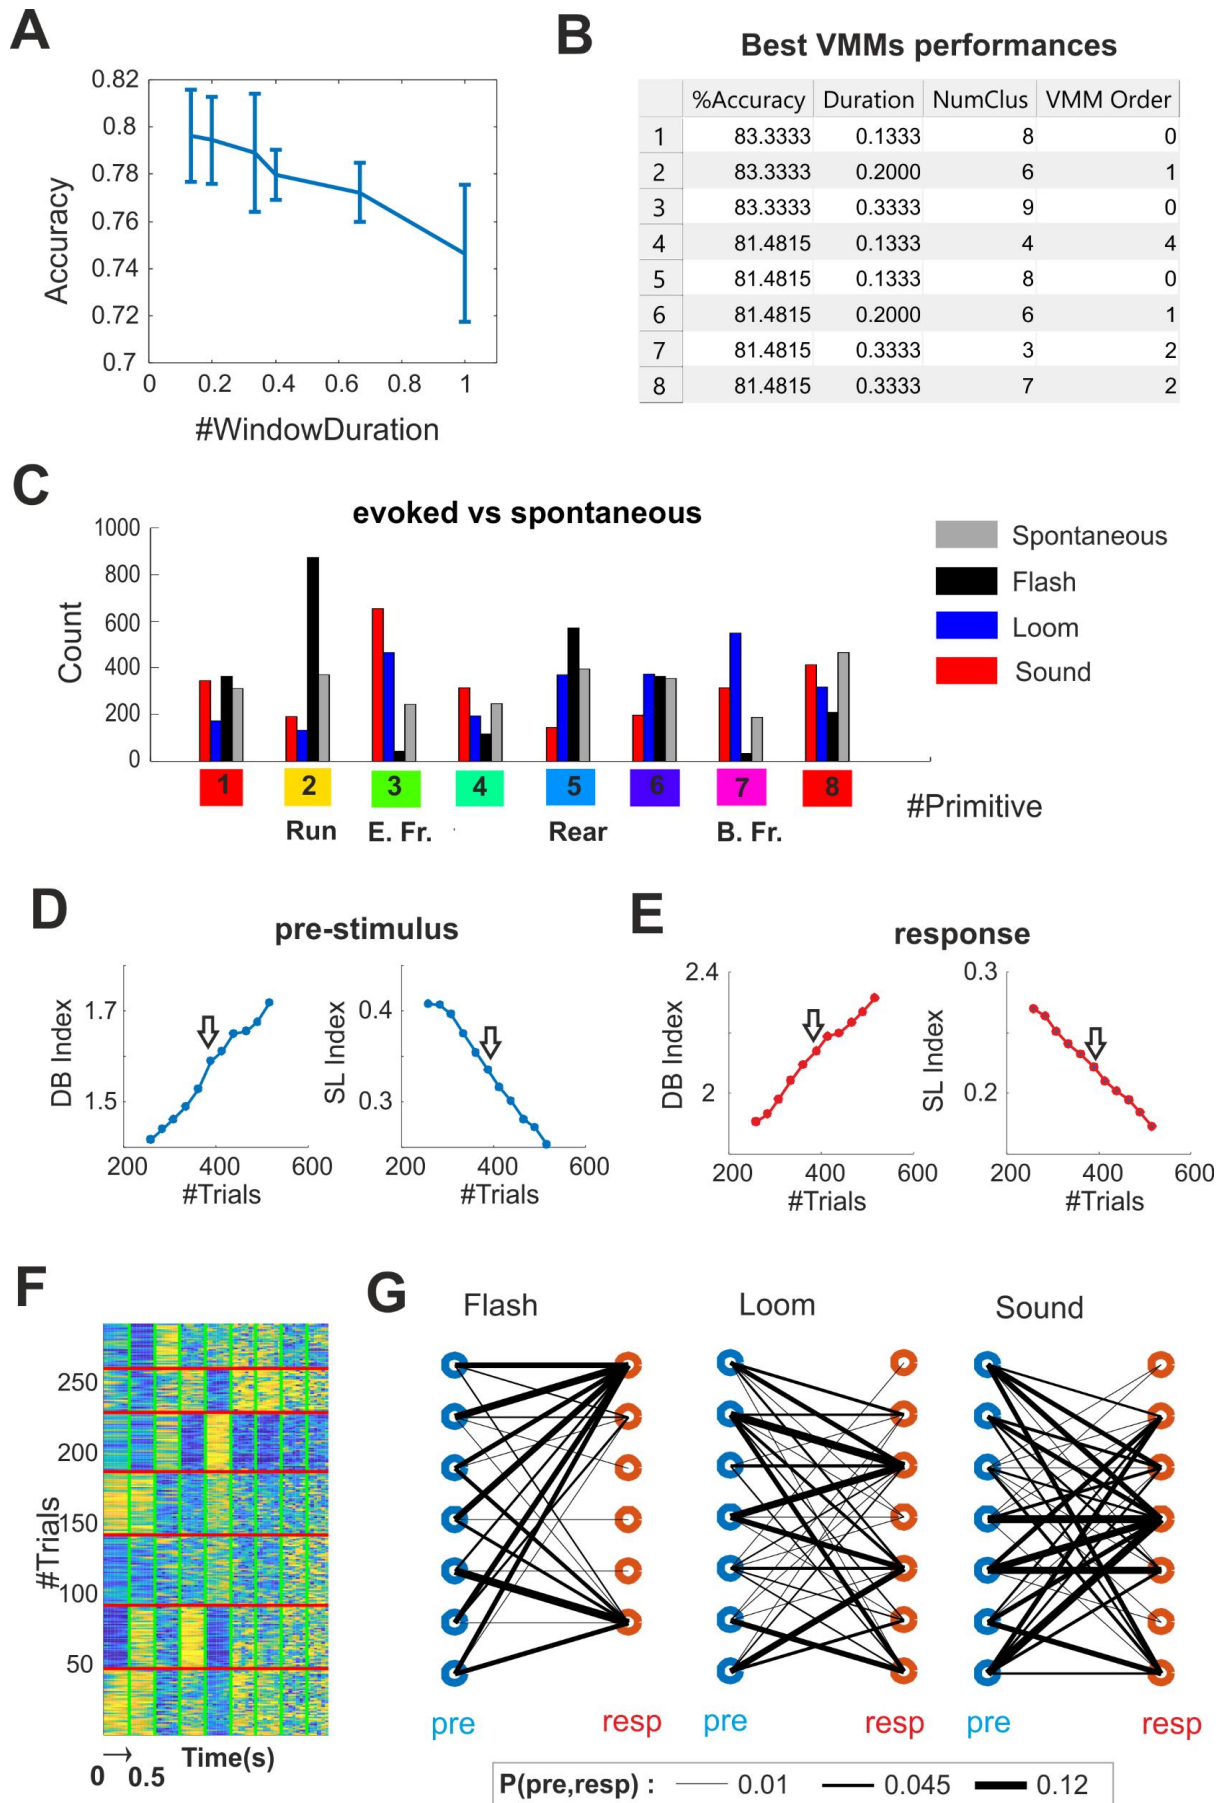



627

628 **Figure 7: The mapping between stimulus and response is not uniquely defined by initial**  
629 **conditions. A)** Matrix representing the concatenation of all the measures of posture and  
630 movements for the 0.5s preceding the stimulus onset. Trials (n=516) have been partitioned in  
631 7 clusters to match the cardinality of response clustering shown in **Fig. 5D. B)** Joint probability  
632 of pre-stimulus (blue circles) and response clusters (red circles) for Flash, Loom and Sound  
633 stimuli. The probability value is proportional to the width of the lines connecting pre-stimulus  
634 and response as shown in legend. **C)** Head elevation is calculated as the vertical angle between  
635 nose and neck while head azimuth as the angle of the nose projection on the X-Y plane. **D)**  
636 Example of three initial positions. Position 2 is distant from position 1 along the X-Y  
637 coordinates but can be exactly superimposed to it by a single rotation along the Z axis.  
638 Position 3 is closer to position 1 along the X-Y coordinates but, in order to superimpose these  
639 two positions, a translation and two rotations are required. **E)** Example of three partitions of  
640 initial positions from the dataset, each pose represents an individual trial. **E)** Mutual  
641 Information is estimated as function of the inverse of the overall number of partitions (1/#IP)  
642 across 5 dimensions (head elevation and azimuth and head X,Y,Z coordinates). The dotted  
643 black lines indicate the entropy of the response clusters.

644 **STAR Methods**

645

646 **RESOURCE AVAILABILITY**

647

648 **Lead Contact**

649

650 Further information and requests for resources, reagents or raw data should be directed to  
651 and will be fulfilled by the Lead Contact, Riccardo Storchi  
652 (riccardo.storchi@manchester.ac.uk)

653

654 **Materials Availability**

655

656 This study did not generate new unique reagents.

657

658 **Data and Code Availability**

659

660 Data and source codes are available at <https://github.com/RStorchi/HighDimDefenseBehaviours>

661

662 **EXPERIMENTAL MODEL AND SUBJECT DETAILS**

663

664 **Animals**

665

666 In this study we used C57Bl/6 mice (n = 29, all male) obtained from obtained from the  
667 Biological Services facility at University of Manchester. All mice were stored in cages of 3  
668 individuals and were provided with food and water ad libitum. Mice were kept on a 12:12  
669 light dark cycle.

670

671 **Ethical Statement**

672

673 Experiments were conducted in accordance with the Animals, Scientific Procedures Act of  
674 1986 (United Kingdom) and approved by the University of Manchester ethical review  
675 committee.

676

677 **METHOD DETAILS**

678

679 **Behavioural Experiments**

680

681 The animals were recorded in a square open field arena (dimensions: 30cm x 30 cm; **Fig. S1A**  
682 and **S1B**). Experiments were conducted at Zeitgeber time 6 or 18 (respectively n = 14 and 15  
683 animals). During transfer between the cage and the behavioural arena we used the tube  
684 handling procedure instead of tail picking, as prescribed in [51], in order to minimise stress  
685 and reduce variability across animals. After transferring to the behavioural arena the animals  
686 were allowed 10 minutes to habituate to the environment before starting the experiment.  
687 Auditory white noise background at 64 dB(C) and background illumination ( $4.08 \cdot 10^{10}$ ,  
688  $1.65 \cdot 10^{13}$ ,  $1.94 \cdot 10^{13}$  and  $2.96 \cdot 10^{13}$  photon/cm<sup>2</sup>/s respectively S-cone opsin, Melanopsin,  
689 Rhodopsin and M-cone opsin) were delivered throughout habituation and testing. In each

690 experiment we delivered 6 blocks of stimuli where each block was constituted by a flash, a  
691 looming and a sound. The order of the stimuli was independently randomised within each  
692 block. The inter-stimulus-interval was fixed at 70 seconds.

693

## 694 **Visual and Auditory Stimuli**

695

696 The flash stimulus provided diffuse excitation of all photoreceptors (S-cone opsin:  $4.43 \cdot 10^{12}$   
697 photon/cm<sup>2</sup>/s; Melanopsin:  $2.49 \cdot 10^{15}$  photon/cm<sup>2</sup>/s; Rhodopsin:  $1.98 \cdot 10^{15}$  photon/cm<sup>2</sup>/s;  
698 M-cone opsin:  $7.09 \cdot 10^{14}$  photon/cm<sup>2</sup>/s). As looming stimulus we used two variants: a  
699 “standard” black looming (87% Michelson Contrast; looming speed = 66deg/s) and a modified  
700 looming where the black disc was replaced by a disc with a grating pattern (Spatial Frequency  
701 = 0.068 cycles/degree; Michelson Contrast: 35% for white vs grey, 87% for grey vs black, 94%  
702 for white vs black; looming speed = 66deg/s). As auditory stimuli we used either a pure tone  
703 (C6 at 102 dB(C)) or a white noise (at 89 dB(C)) both presented for 1 second. The selection of  
704 looming and sound variants was randomly generated at each trial.

705

## 706 **Experimental Set-Up**

707

708 The animals were recorded with 4 programmable cameras (Chameleon 3 from Point Grey;  
709 frame rate = 15Hz). The camera lenses were covered with infrared cut-on filters (Edmund  
710 Optics) and fed with constant infrared light. The experiments were controlled by using  
711 Psychopy (version 1.82.01) [52]. Frame acquisition was synchronized with the projected  
712 images and across cameras by a common electrical trigger delivered by an Arduino Uno board  
713 (arduino.cc) controlled by Psychopy through a serial interface (pyserial). Trigger control was  
714 enabled on Chameleon 3 cameras through FlyCapture2 software (from Point Grey). All movies  
715 were encoded as M-JPEG from RGB 1280 (W) x 1040 (H) images. For tracking RGB images  
716 were converted to grayscale.

717 In order to deliver the flash stimulation we used two LEDs mounted inside the arena (model  
718 LZ4-00B208, LED engin; controlled by T-Cube drivers, Thorlabs). The auditory stimuli were  
719 provided by two speakers positioned outside the arena. Background illumination and the  
720 looming stimuli were delivered by a projector onto a rear projection screen mounted at the  
721 top of the arena. Calculation of retinal irradiance for each photoreceptor was based on  
722 Govardovskii templates [53] and lens correction functions [54].

723

## 724 **QUANTIFICATION AND STATISTICAL ANALYSES**

725

### 726 **Reconstruction of 3D poses:**

727

728 Three dimensional reconstruction of the mouse body was based on simultaneously tracked  
729 body landmarks from four the cameras (**Fig. S1A&B**). The four camera system was calibrated  
730 using the Direct Linear Transform algorithm [55] before data collection by using Lego® objects  
731 of known dimensions (**Fig. S1C-F**). The reconstruction error after triangulation was  $0.153 \pm$   
732  $0.0884SD$  cm. For source codes and a detailed description of the calibration process see online  
733 material (<https://github.com/RStorchi/HighDimDefenseBehaviours/tree/master/3Dcalibration>).

734 After data collection body landmarks were detected independently for each camera by using  
735 DeepLabCut software [29]. We used  $n = 5$  body landmarks: the nose-tip, the left and right  
736 ears, the neck base and the tail base (as shown **Fig. 1A**). When the likelihood of a landmark

737 was higher than 0.5 the landmark was considered valid. Valid landmarks were then used to  
738 estimate the 3D coordinates of the body points using least square triangulation. The result  
739 of this initial 3D reconstruction was saved as raw reconstruction (**Fig. 1B, Raw**).

740 The raw reconstruction contained outlier poses caused by incorrect or missing landmark  
741 detections (typically occurring when the relevant body parts were occluded). To correct those  
742 outliers we developed a method that automatically identifies correctly reconstructed body  
743 points and uses the knowledge of the geometrical relations between all points to re-estimate  
744 the incorrectly reconstructed (or missing) points. Knowledge of these geometrical relations  
745 was provided by a Statistical Shape Model (SSM).

746 We first estimated a statistical shape model (SSM) of the mouse body based on  $n = 5$  body  
747 points [56]. This was achieved by using a set of 400 poses, each represented by a  $n \times 3$  matrix  
748  $\mathbf{X}_{train}$  whose correct 3D reconstruction was manually assessed. During manual assessment  
749 the coordinate of each body landmark across the four cameras was evaluated by a human  
750 observer. When all landmark location ( $n = 20$ , 5 landmarks for each of the 4 cameras) were  
751 approved the associated 3D pose was labelled as correct. Each training pose  $\mathbf{X}_{train}$  was then  
752 aligned to a reference pose using Partial Procrustes Superimposition (PPS) and the mean pose  
753  $\bar{\mathbf{X}}$  calculated. This algorithm estimates the  $3 \times 3$  rotation matrix  $\mathbf{R}$  and the  $n \times 3$  translation  
754  $\mathbf{T}$  matrix that minimize the distance  $\|\bar{\mathbf{X}} - (\mathbf{X}_{train}\mathbf{R} + \mathbf{T})\|_F$  calculated by using the Frobenius  
755 norm. A principal component analysis was then performed on the aligned poses to obtain a  
756 set of eigenposes  $\mathbf{P}$  and eigenvalues  $\lambda$ . The first  $p = 3$  eigenposes were sufficient to explain  
757 90.37% of the variance associated with shape changes in our training set (42.68%, 30.85% and  
758 16.84% respectively). Based on those eigenposes the SSM model enabled to express any  
759 aligned pose  $\mathbf{X}$  as

760

$$\mathbf{X} = \bar{\mathbf{X}} + \sum_i^p b_i \mathbf{P}_i \quad (3)$$

761 where  $b_i$  represent the shape parameters. To identify outlier poses each pose  $\mathbf{X}$  was first  
762 aligned to the mean pose  $\bar{\mathbf{X}}$  and shape parameters were estimated. A pose was labelled as  
763 incorrect when either the Euclidean distance between  $\bar{\mathbf{X}}$  and  $\mathbf{X}$  or any of the shape  
764 parameters exceeded pre-set thresholds.

765 Outlier poses could be corrected if only 1-2 body points were incorrectly reconstructed by  
766 using the remaining body points and the trained SSM. Correctly reconstructed body points,  
767 represented by the  $(n - 2) \times 3$  matrix  $\mathbf{X}_{subset}$ , were identified as the subset of points, out  
768 of all possible  $(n - 2)$  subsets, that minimized the distance  $\|\bar{\mathbf{X}}_{subset} \mathbf{R}_{subset} +$   
769  $\mathbf{T}_{subset} - \mathbf{X}_{subset}\|_F$ . Here the matrices  $\mathbf{R}_{subset}$  and  $\mathbf{T}_{subset}$  were obtained by aligning the  
770 corresponding body points of the reference pose,  $\bar{\mathbf{X}}_{subset}$ , to the selected  $(n - 2) \times 3$   
771 matrix  $\mathbf{X}_{subset}$ . The shape parameters  $b_i$  were treated as missing data and re-estimated by  
772 applying Piecewise Cubic Hermite Interpolation on the shape parameter time series. The  
773 corrected pose  $\mathbf{X}$  was then re-estimated as  $\mathbf{X} = (\bar{\mathbf{X}} + \sum_{i=1}^p b_i \mathbf{P}_i) \mathbf{R}_{subset} + \mathbf{T}_{subset}$ .

774 These preliminary stages enabled to replace gross outliers in the raw 3D reconstruction. We  
775 then used all poses  $\mathbf{X}$  and associated shape parameters as input for an optimization  
776 procedure aimed at obtaining a refined 3D reconstruction by minimizing the following cost  
777 function:

778

$$C(\mathbf{b}, \mathbf{R}, \mathbf{T}) = \left\| \bar{\mathbf{X}} - \left( \mathbf{X} + \sum_{i=1}^p b_i \mathbf{P}_i \right) \mathbf{R} + \mathbf{T} \right\|_F + \alpha \sum_{i=1}^{N_p} \frac{b_i^2}{\lambda_i} \quad (4)$$

779

780 where the right-hand side of the *equation 3* represents a regularization factor to penalize for  
781 excessive changes in body shape. The value for the regularization parameter  $\alpha$ , set at 0.001,  
782 was determined by first applying this cost function to a simulated dataset. For all further  
783 analyses the time series of each element of  $\mathbf{b}$ ,  $\mathbf{R}$  and  $\mathbf{T}$  were smoothed using the kernel  $w =$   
784  $[0.2 \ 0.6 \ 0.2]$ . After smoothing each rotation matrix  $\mathbf{R}(t)$  was renormalized by using Singular  
785 Value Decomposition.

786 Following this reconstruction procedure the mouse pose at any given frame  $t$  was defined by  
787 shape parameters  $\mathbf{b}(t)$  and rigid transformations  $\mathbf{R}(t)$  and  $\mathbf{T}(t)$  as reported in *equation 1*.  
788 The final 3D poses were defined as refined reconstruction (**Fig. 1B, Refined**). A dynamic  
789 visualization of the refined reconstruction can be found in **Supplementary Movie 1**. All 3D  
790 data and source codes for estimating SSM and the refined reconstruction can be found here:  
791 <https://github.com/RStorchi/HighDimDefenseBehaviours/tree/master/3Dreconstruction>

792

### 793 **Validation of the 3D reconstruction**

794

795 In order to compare raw and refined poses we first quantified the number of outliers. A pose  
796 was defined as outlier when, once aligned with the reference pose, its Euclidean distance  
797 from the reference in a 15 dimensional space (5 body points along the X,Y,Z axes) was larger  
798 than 5cm. For the raw and refined poses we detected respectively %3.31 (1037/31320) and  
799 1.26% (395/31320) outliers (**Fig. S2A&B**). In the raw 3D reconstruction the outliers were  
800 widespread across 178 trials while in the refined 3D reconstruction the outliers were  
801 concentrated in 7 trials that were then removed for all the subsequent analyses. Among inlier  
802 poses the distance from reference pose was only slightly reduced (**Fig. S2C, inset**). However  
803 for the refined inlier poses the distance from the reference pose was fully explained by only  
804 3 components while 9 components were required for the raw inlier poses (**Fig. S2D**). The low  
805 dimensional variability associated with the refined inlier poses reflects the constraints  
806 imposed by the SSM (via the 3 eigenposes) while the high dimensional variability associated  
807 with the raw inlier poses reflects the effect of high dimensional noise. Such low and high  
808 dimensional variability can be clearly observed for the whole dataset of inlier poses in **Fig.**  
809 **S2E**.

810

### 811 **Interpretation of the eigenposes**

812

813 The SSM enabled to identify a set of eigenposes that captured coordinated changes in the 3D  
814 shape of the animal body encompassing all the five body landmarks (see eq.2). To gain more  
815 intuitive insights about what type of shape changes were captured by each eigenpose it is  
816 useful to visualize those changes. We did so by creating a movie (**Supplementary Movie 2**)  
817 where we applied a sinusoidal change to individual shape parameters in *equation 3*. In this  
818 way, at any given time  $t$  and for the  $i^{th}$  eigenpose, the mouse body could be described  
819 as  $\mathbf{X}(t) = \bar{\mathbf{X}} + \lambda_i \sqrt{6} \sin(2\pi t) \cdot \mathbf{P}_i$ . By looking at the movie it is apparent that each eigenpose  
820 captures coordinated changes in the distances between body landmarks and angles between  
821 head and body. To quantify those changes as function of each eigenpose we selected, based  
822 on the movie inspection, a set of four measures: nose-tail distance, neck-tail distance and

823 head-to-body angles on the XY and the YZ planes. We found that the first eigenpose best  
824 correlated with nose-tail distance and head-to-body on the YZ plane indicating that this  
825 eigenpose captures different levels of body elongation (**Fig. S3A,D**). The second eigenpose  
826 best correlated with head-to-body on the XY plane thus capturing left-right bending (**Fig. S3B**).  
827 The third eigenpose correlated best with neck-tail distance indicating again a change in body  
828 elongation (**Fig. S3C**).

829

### 830 **Normalization of the behavioural measures:**

831

832 The full set of posture and movement measures was calculated from the refined 3D  
833 reconstruction as analytically described in **Fig. 1d**. Each measure was then quantile  
834 normalized in the range [0, 1]. First all the values of each measure ( $n = \text{\#time points} \times \text{\#trials}$   
835  $= 320 \times 516 = 165120$ ) were ranked from low to high. Then, according to its rank, each value  
836 was assigned to an interval. Each interval contained the same number of values. The interval  
837 containing the lowest values was assigned to 0 and the interval containing the lowest value  
838 was assigned to 1. All intermediate intervals were linearly spaced in the range (0,1). Finally  
839 the values were converted to their interval number.

840

### 841 **Validation of the postural and movement measures**

842

843 In order to validate the measures of postures and movements (**Fig. 1C**) we compared such  
844 measures with a manually annotated set. The human observer (AA) watched the behavioural  
845 movies and annotated the start and end timing of each action across a subset of data (18 trials  
846 from 24 mice, 18 trials/mouse). We focussed on four annotated actions: “Walk”, “Turn”,  
847 “Freeze” and “Rear”. The action “Turn” included left/right bending of the body as well as full  
848 body rotations around its barycentre. The action “Rear” included both climbing up walls and  
849 standing on hind legs without touching the walls. All annotated actions lasted on average less  
850 than 1 second (“Walk”:  $0.71s \pm 0.49s$ ,  $n = 473$ ; “Turn”:  $0.68s \pm 0.42s$ ,  $n = 214$ ; “Rear”:  
851  $0.88s \pm 0.78s$ ,  $n = 505$ ; mean $\pm$ SD) except “Freeze” ( $1.12s \pm 0.70s$ ,  $n = 371$ ; mean $\pm$ SD).

852 Overall the automatic measures of Locomotion, Body Rotation, Freeze and Rearing (**Fig. 1C**)  
853 were well matched with manual annotations while also providing additional information  
854 about changes in body shape. Thus “Walk” was associated with the largest increase in  
855 Locomotion (**Fig. S4A**, right panel) as well as an increase in Body Elongation and decrease in  
856 Rearing and Body Bending (**Fig. S4A**, left panel). “Turn” was associated with the largest  
857 increase in Body Rotation and Body Bending (**Fig. S4B**). “Freeze” was associated with the  
858 largest increase in our measure of Freeze and the largest decrease in Locomotion (**Fig. S4C**,  
859 right pane). “Rear” was associated with the largest increase in our measure of Rearing and  
860 high sustained Body Elongation (**Fig. S4D**, left pane).

861

### 862 **Response Divergence**

863

864 We first calculated the Euclidean distance  $D$  between average time series obtained from two  
865 stimuli. This measure was then normalized by the average distance  $\langle D_{sh} \rangle$  obtained by  
866 randomly shuffling across trials the association between stimulus and response ( $n = 1000$   
867 shuffles). Finally response divergence was calculated as  $((D - \langle D_{sh} \rangle) / \langle D_{sh} \rangle)$ . To test for  
868 significance we used a shuffle test. We counted the number of times  $D$  was larger than  $D_{sh}$



869 and identified response divergence as significant when  $D > D_{sh}$  in more than 95% of the  
870 shuffle repeats.

871

872 **Rank estimation:**

873

874 For rank estimation we used the Bi-Cross Validation method proposed by (Owen and Perry,  
875 2009). The  $m \times n$  response matrix  $X$  is partitioned into four submatrices  $A, B, C, D$  where  
876  $A \in R^{r \times s}, B \in R^{r \times (n-s)}, C \in R^{(m-r) \times s}, D \in R^{(m-r) \times (n-s)}$ . Then the matrices  $B, C$  and  
877  $D$  could be used to predict  $A$ . Specifically if both  $X$  and  $D$  have rank  $k$  then  $A = BD^+C =$   
878  $B(\hat{D}^k)^+C$  [14], where  $D^+$  represents the pseudoinverse of  $D$  and  $\hat{D}^k$  represents the  $k$ -rank  
879 approximation of  $D$  obtained by Singular Value Decomposition. Using this property we  
880 partitioned the rows and columns of  $X$  respectively into  $h$  and  $l$  subsets so that each  $h \times l$   
881 subset represented a different hold out matrix  $A$ . Finally we estimated the Bi-Cross Validation  
882 error as function of the  $k$ -rank approximation of the  $D$  matrices as:

883

$$BCV(k) = \sum_{i=1}^h \sum_{j=1}^l \left\| A_{i,j} - B_{i,j} (\hat{D}_{i,j}^{(k)})^+ C_{i,j} \right\|_F^2 \quad (5)$$

884

885 By systematically changing  $k$  we expect the error would reach its minimum around the true  
886 rank of  $X$ .

887

888 **Stimulus-response specificity:**

889

890 The Specificity Index (**SI**) for each behavioural response was estimated as the weighted  
891 fraction nearest neighbour responses evoked by the same stimulus class. A formal definition  
892 of this index is given as follows. Let each  $i^{th}$  behavioural response be quantified by its  
893 projection  $X_i$  on the  $R^d$  space of the first  $d$  principal components. We define the distance  
894 between each pair of responses as  $dist_{ij} = \|X_i - X_j\|_{L2}$  and its inverse  $w_{ij} = 1/dist_{ij}$ .  
895 The  $K$ -neighbourhood of each target response is then defined as the  $K$  responses associated  
896 with the smallest pairwise distances. Let each  $i^{th}$  response be also associated with a variable  
897  $Y_i = \{1,2\}$  representing the stimulus class. In this way each  $i^{th}$  response is defined by the  
898 pair  $(X_i, Y_i) \in R^d \times \{1,2\}$ . We can then define  $SI_i$ , the Specificity Index for the  $i^{th}$  response  
899 as:

900

$$SI_i = \frac{\sum_{j=1}^K w_{ij} I(Y_i = Y_j)}{\sum_{j=1}^K w_{ij}} \quad (6)$$

901

902 Where the indicator function  $I()$  is equal to 1 if  $Y_i = Y_j$  and 0 otherwise.

903

904 **Decoding Analysis:**

905

906 Decoding performances for K-Nearest Neighbour (KNN) and Random Forest were estimated  
907 by using 10-fold cross-validation. Dimensionality reduction based on Principal Component  
908 Analysis was performed on the data before training the classifiers. To maximize performances

909 the KNN algorithm was run by systematically varying the parameter K and the number of  
910 Principal Components (**Fig. S6A,B**) while the Random Forest algorithm was run by  
911 systematically varying the number of Trees (within the set [10, 20, 40, 80, 160, 320]) and the  
912 number of Principal Components. Each tree was constrained to express a maximum number  
913 of 20 branches. For robustness, the estimates of decoding performances for both KNN and  
914 Random Forest were repeated 50 times for each parameter combination. Data and source  
915 codes for specificity and decoding analyses can be found here:

916 <https://github.com/RStorchi/HighDimDefenseBehaviours/tree/master/Decoding>

917

## 918 **Clustering and Information Analysis**

919

920 Clustering was performed by using k-means algorithm with k-means++ initialization (Arthur  
921 and Vassilvitskii, 2007). The number of clusters  $k$  was systematically increased in the range (2-  
922 30). For each value of  $k$ , clustering was repeated 50 times and for each repeat the best  
923 clustering results was selected among 100 independent runs. We then used Shannon's  
924 Mutual Information to estimate the statistical dependence between response clusters and  
925 stimuli. A similar approach has been previously applied to neuronal responses (see e.g. [57-  
926 59]). In order to estimate Shannon's Mutual Information the probabilities distributions  $p(G)$   
927 and  $p(G|S)$ , where  $\mathbb{G} = (g_1, \dots, g_k)$  indicates the cluster set and  $\mathbb{S} = (s_1, \dots, s_n)$  the  
928 stimulus set, were estimated directly from the frequency histograms obtained from our  
929 dataset. Thus for  $p(G)$  we counted the number of elements in each cluster and we divided by  
930 the overall number of elements. We estimated  $p(G, S)$  in the same way and used it to  
931 estimate  $p(G|S)$  as  $p(G, S)/p(S)$ . From these distributions the response and noise entropies  
932 were calculated as  
933

$$H(G) = - \sum_{g \in \mathbb{G}} p(g) \log_2 p(g) \quad (7)$$

$$H(G|S) = - \sum_{g \in \mathbb{G}, s \in \mathbb{S}} p(g, s) \log_2 p(g|s) \quad (8)$$

934 These naïve estimates were then corrected for the sampling bias by using quadratic  
935 extrapolation as in [60]. Mutual Information ( $MI$ ) was then calculated from the difference of  
936 these corrected estimates. The change in  $MI$  as function of the number of clusters was fit by  
937 using *equation 2* through a mean square error minimization based on the interior point  
938 method (Matlab function *fmincon*). For fitting the values of the parameters  $a, b$  and  $\tau$  were  
939 constrained to be positive. Data and source code for clustering analysis can be found here:

940 <https://github.com/RStorchi/HighDimDefenseBehaviours/tree/master/Diversity>

941

## 942 **Analysis of Behavioural Primitives**

943

944 Behavioural primitives were first identified by applying kmeans++ clustering ([61], best of  $n =$   
945 100 replicates for each parameter combination) to the response matrix. For this analysis the  
946 response matrix encompassed an epoch starting 0.33s before the stimulus onset and ending  
947 2s after the onset. Since both the number of clusters and the duration of the primitive was  
948 unknown we repeated the clustering for a range of [2,10] clusters and for six different  
949 durations (0.133s, 0.2s, 0.333s, 0.4s, 0.666s and 1s). In order to model arbitrarily (finite) long

950 temporal relations between subsequent primitives occurring on the same trial we used  
951 Variable-order Markov Models (VMMs, [62, 63]). Therefore an additional parameter of this  
952 analysis was represented by the maximum Markov order that ranged from 0 (no statistical  
953 dependence between two subsequent primitives), to the whole length  $L$  of the trial ( $L = 15$ ,  
954 10, 6, 5, 3 and 2 for primitives of 0.133s, 0.2s, 0.333s, 0.4s, 0.666s and 1s duration). To  
955 determine the best VMMs we took a decoding approach. This enabled us to rank the models  
956 according to their accuracy in predicting the stimulus on hold-out data. For each combination  
957 of cluster cardinality, primitive duration and maximum Markov order we trained three VMMs,  
958 one for each stimulus (flash, loom and sound). Thus each of the three VMM (respectively  
959  $VMM_{flash}$ ,  $VMM_{loom}$ ,  $VMM_{sound}$ ) was separately trained by using a lossless compression  
960 algorithm based on Prediction by Partial Matching [64] on a subset of trials associated with  
961 only one stimulus. On the test set the stimulus  $\hat{S}$  was then decoded by choosing the VMM  
962 with highest likelihood  $\hat{S} = \underset{stim \in \{flash, loom, sound\}}{\operatorname{argmax}}(VMM_{stim})$ . Increasing the  
963 temporal resolution of the model by using a larger number of shorter duration primitives  
964 increased decoding accuracy (**Fig. S7A**). Parameters for the eight most accurate models are  
965 reported in **Fig. S7B**. Data and source code for VMMs analysis can be found here:  
966 <https://github.com/RStorchi/HighDimDefenseBehaviours/tree/master/VMMs>

967

## 968 **Clustering Refinement**

969

970 To test the possibility that the “one-to-many” mapping shown in **Fig. 7B** arise from incorrect  
971 cluster membership we developed a procedure to improve goodness-of-clustering. The  
972 element of each cluster were ranked according to their distance from the centroid. Then for  
973 each centroid we removed up to 50% of its elements according to such distance. This resulted  
974 in improved clustering metrics as shown in **Fig. S7D&E**.

975

## 976 **Estimating the Effects of Initial Positions**

977

978 Initial positions were quantified according to 5 dimensions: head elevation and azimuth, and  
979 head X,Y,Z coordinates. In order to partition the space of initial conditions we first generated  
980 a set of 5 elements arrays with up to 8 partitions (each partition with the same number of  
981 trials) for each dimension (e.g. [1, 3, 4, 1, 1] indicates 3 and 4 partitions respectively along the  
982 2<sup>nd</sup> and 3<sup>rd</sup> dimension) . For each array in this set the overall number of partitions across the  
983 5 dimensions was the product of the number of partitions in each dimension (e.g. equal to 12  
984 for the previous example). From the initial set we then removed all the items with an overall  
985 number of partitions larger than 20. Mutual Information was then estimated for each  
986 partition array as described in **Clustering and Information Analysis**. Finally a linear  
987 extrapolation was performed to estimate Mutual Information in the limit of an infinite  
988 number of partitions.

989

## 990 **References**

- 991 1. Cooke, S.F., Komorowski, R.W., Kaplan, E.S., Gavornik, J.P., and Bear, M.F. (2015). Visual  
992 recognition memory, manifested as long-term habituation, requires synaptic plasticity in V1.  
993 *Nature Neuroscience* 18, 926-926.
- 994 2. Smeds, L., Takeshita, D., Turunen, T., Tiihonen, J., Westo, J., Martyniuk, N., Seppanen, A., and  
995 Ala-Laurila, P. (2019). Paradoxical Rules of Spike Train Decoding Revealed at the Sensitivity  
996 Limit of Vision. *Neuron* 104, 576-587 e511.
- 997 3. Hoy, J.L., Bishop, H.I., and Niell, C.M. (2019). Defined Cell Types in Superior Colliculus Make  
998 Distinct Contributions to Prey Capture Behavior in the Mouse. *Curr Biol* 29, 4130-4138  
999 e4135.
- 1000 4. Hoy, J.L., Yavorska, I., Wehr, M., and Niell, C.M. (2016). Vision Drives Accurate Approach  
1001 Behavior during Prey Capture in Laboratory Mice. *Curr Biol* 26, 3046-3052.
- 1002 5. De Franceschi, G., Vivattanasarn, T., Saleem, A.B., and Solomon, S.G. (2016). Vision Guides  
1003 Selection of Freeze or Flight Defense Strategies in Mice. *Curr Biol* 26, 2150-2154.
- 1004 6. Evans, D.A., Stempel, A.V., Vale, R., Ruehle, S., Lefler, Y., and Branco, T. (2018). A synaptic  
1005 threshold mechanism for computing escape decisions. *Nature* 558, 590-594.
- 1006 7. Storchi, R., Rodgers, J., Gracey, M., Martial, F.P., Wynne, J., Ryan, S., Twining, C.J., Cootes,  
1007 T.F., Killick, R., and Lucas, R.J. (2019). Measuring vision using innate behaviours in mice with  
1008 intact and impaired retina function. *Sci Rep* 9, 10396.
- 1009 8. Yilmaz, M., and Meister, M. (2013). Rapid Innate Defensive Responses of Mice to Looming  
1010 Visual Stimuli. *Current Biology* 23, 2011-2015.
- 1011 9. Shang, C.P., Chen, Z.J., Liu, A.X., Li, Y., Zhang, J.J., Qu, B.L., Yan, F., Zhang, Y.N., Liu, W.X., Liu,  
1012 Z.H., et al. (2018). Divergent midbrain circuits orchestrate escape and freezing responses to  
1013 looming stimuli in mice. *Nature Communications* 9.
- 1014 10. Salay, L.D., Ishiko, N., and Huberman, A.D. (2018). A midline thalamic circuit determines  
1015 reactions to visual threat. *Nature* 557, 183-189.
- 1016 11. Redgrave, P., Dean, P., Souki, W., and Lewis, G. (1981). Gnawing and changes in reactivity  
1017 produced by microinjections of picrotoxin into the superior colliculus of rats.  
1018 *Psychopharmacology (Berl)* 75, 198-203.
- 1019 12. Dean, P., Redgrave, P., and Westby, G.W. (1989). Event or emergency? Two response  
1020 systems in the mammalian superior colliculus. *Trends Neurosci* 12, 137-147.
- 1021 13. Koch, M. (1999). The neurobiology of startle. *Prog Neurobiol* 59, 107-128.
- 1022 14. Owen, A.B., and Perry, P.O. (2009). Bi-Cross-Validation of the Svd and the Nonnegative  
1023 Matrix Factorization. *Annals of Applied Statistics* 3, 564-594.
- 1024 15. Krakauer, J.W., Ghazanfar, A.A., Gomez-Marin, A., Maclver, M.A., and Poeppel, D. (2017).  
1025 Neuroscience Needs Behavior: Correcting a Reductionist Bias. *Neuron* 93, 480-490.
- 1026 16. Bernstein, J.G., and Boyden, E.S. (2011). Optogenetic tools for analyzing the neural circuits of  
1027 behavior. *Trends in Cognitive Sciences* 15, 592-600.
- 1028 17. Oh, S.W., Harris, J.A., Ng, L., Winslow, B., Cain, N., Mihalas, S., Wang, Q., Lau, C., Kuan, L.,  
1029 Henry, A.M., et al. (2014). A mesoscale connectome of the mouse brain. *Nature* 508, 207-  
1030 214.
- 1031 18. Ero, C., Gewaltig, M.O., Keller, D., and Markram, H. (2018). A Cell Atlas for the Mouse Brain.  
1032 *Front Neuroinform* 12, 84.
- 1033 19. Reinhard, K., Li, C., Do, Q., Burke, E.G., Heynderickx, S., and Farrow, K. (2019). A projection  
1034 specific logic to sampling visual inputs in mouse superior colliculus. *Elife* 8.
- 1035 20. Shang, C., Liu, Z., Chen, Z., Shi, Y., Wang, Q., Liu, S., Li, D., and Cao, P. (2015). BRAIN  
1036 CIRCUITS. A parvalbumin-positive excitatory visual pathway to trigger fear responses in mice.  
1037 *Science* 348, 1472-1477.
- 1038 21. Tovote, P., Esposito, M.S., Botta, P., Haudun, F.C., Fadok, J.P., Markovic, M., Wolff, S.B.E.,  
1039 Ramakrishnan, C., Fenno, L., Deisseroth, K., et al. (2016). Midbrain circuits for defensive  
1040 behaviour. *Nature* 534, 206-+.

- 1041 22. Wei, P., Liu, N., Zhang, Z., Liu, X., Tang, Y., He, X., Wu, B., Zhou, Z., Liu, Y., Li, J., et al. (2015).  
1042 Processing of visually evoked innate fear by a non-canonical thalamic pathway. *Nat Commun*  
1043 *6*, 6756.
- 1044 23. Datta, S.R., Anderson, D.J., Branson, K., Perona, P., and Leifer, A. (2019). Computational  
1045 Neuroethology: A Call to Action. *Neuron* *104*, 11-24.
- 1046 24. Mathis, M.W., and Mathis, A. (2020). Deep learning tools for the measurement of animal  
1047 behavior in neuroscience. *Curr Opin Neurobiol* *60*, 1-11.
- 1048 25. Courtine, G., Gerasimenko, Y., van den Brand, R., Yew, A., Musienko, P., Zhong, H., Song, B.,  
1049 Ao, Y., Ichiyama, R.M., Lavrov, I., et al. (2009). Transformation of nonfunctional spinal  
1050 circuits into functional states after the loss of brain input. *Nat Neurosci* *12*, 1333-1342.
- 1051 26. Machado, A.S., Darmohray, D.M., Fayad, J., Marques, H.G., and Carey, M.R. (2015). A  
1052 quantitative framework for whole-body coordination reveals specific deficits in freely  
1053 walking ataxic mice. *Elife* *4*.
- 1054 27. Petersen, R.S., Colins Rodriguez, A., Evans, M.H., Campagner, D., and Loft, M.S.E. (2020). A  
1055 system for tracking whisker kinematics and whisker shape in three dimensions. *PLoS Comput*  
1056 *Biol* *16*, e1007402.
- 1057 28. Berman, G.J., Choi, D.M., Bialek, W., and Shaevez, J.W. (2014). Mapping the stereotyped  
1058 behaviour of freely moving fruit flies. *J R Soc Interface* *11*.
- 1059 29. Mathis, A., Mamidanna, P., Cury, K.M., Abe, T., Murthy, V.N., Mathis, M.W., and Bethge, M.  
1060 (2018). DeepLabCut: markerless pose estimation of user-defined body parts with deep  
1061 learning. *Nat Neurosci* *21*, 1281-1289.
- 1062 30. Pereira, T.D., Aldarondo, D.E., Willmore, L., Kislin, M., Wang, S.S., Murthy, M., and Shaevez,  
1063 J.W. (2019). Fast animal pose estimation using deep neural networks. *Nat Methods* *16*, 117-  
1064 125.
- 1065 31. Graving, J.M., Chae, D., Naik, H., Li, L., Koger, B., Costelloe, B.R., and Couzin, I.D. (2019).  
1066 DeepPoseKit, a software toolkit for fast and robust animal pose estimation using deep  
1067 learning. *Elife* *8*.
- 1068 32. Wiltschko, A.B., Johnson, M.J., Iurilli, G., Peterson, R.E., Katon, J.M., Pashkovski, S.L., Abaira,  
1069 V.E., Adams, R.P., and Datta, S.R. (2015). Mapping Sub-Second Structure in Mouse Behavior.  
1070 *Neuron* *88*, 1121-1135.
- 1071 33. Klaus, A., Martins, G.J., Paixao, V.B., Zhou, P., Paninski, L., and Costa, R.M. (2017). The  
1072 Spatiotemporal Organization of the Striatum Encodes Action Space. *Neuron* *95*, 1171-1180  
1073 e1177.
- 1074 34. Meyer, A.F., Poort, J., O'Keefe, J., Sahani, M., and Linden, J.F. (2018). A Head-Mounted  
1075 Camera System Integrates Detailed Behavioral Monitoring with Multichannel  
1076 Electrophysiology in Freely Moving Mice. *Neuron* *100*, 46-60 e47.
- 1077 35. Markowitz, J.E., Gillis, W.F., Beron, C.C., Neufeld, S.Q., Robertson, K., Bhagat, N.D., Peterson,  
1078 R.E., Peterson, E., Hyun, M., Linderman, S.W., et al. (2018). The Striatum Organizes 3D  
1079 Behavior via Moment-to-Moment Action Selection. *Cell* *174*, 44-58 e17.
- 1080 36. Vale, R., Evans, D.A., and Branco, T. (2017). Rapid Spatial Learning Controls Instinctive  
1081 Defensive Behavior in Mice. *Current Biology* *27*, 1342-1349.
- 1082 37. Berman, G.J., Bialek, W., and Shaevez, J.W. (2016). Predictability and hierarchy in *Drosophila*  
1083 behavior. *Proc Natl Acad Sci U S A* *113*, 11943-11948.
- 1084 38. Cande, J., Namiki, S., Qiu, J., Korff, W., Card, G.M., Shaevez, J.W., Stern, D.L., and Berman,  
1085 G.J. (2018). Optogenetic dissection of descending behavioral control in *Drosophila*. *Elife* *7*.
- 1086 39. Faisal, A.A., Selen, L.P., and Wolpert, D.M. (2008). Noise in the nervous system. *Nat Rev*  
1087 *Neurosci* *9*, 292-303.
- 1088 40. Schroder, S., Steinmetz, N.A., Krumin, M., Pachitariu, M., Rizzi, M., Lagnado, L., Harris, K.D.,  
1089 and Carandini, M. (2020). Arousal Modulates Retinal Output. *Neuron* *107*, 487-495 e489.
- 1090 41. Liang, L., Fratzl, A., Reggiani, J.D.S., El Mansour, O., Chen, C., and Andermann, M.L. (2020).  
1091 Retinal Inputs to the Thalamus Are Selectively Gated by Arousal. *Curr Biol*.



- 1092 42. Grundemann, J., Bitterman, Y., Lu, T., Krabbe, S., Grewe, B.F., Schnitzer, M.J., and Luthi, A.  
1093 (2019). Amygdala ensembles encode behavioral states. *Science* *364*.
- 1094 43. Drion, G., O'Leary, T., and Marder, E. (2015). Ion channel degeneracy enables robust and  
1095 tunable neuronal firing rates. *Proc Natl Acad Sci U S A* *112*, E5361-5370.
- 1096 44. Edelman, G.M., and Gally, J.A. (2001). Degeneracy and complexity in biological systems. *Proc*  
1097 *Natl Acad Sci U S A* *98*, 13763-13768.
- 1098 45. Tononi, G., Sporns, O., and Edelman, G.M. (1999). Measures of degeneracy and redundancy  
1099 in biological networks. *Proc Natl Acad Sci U S A* *96*, 3257-3262.
- 1100 46. Barbano, M.F., Wang, H.L., Zhang, S., Miranda-Barrientos, J., Estrin, D.J., Figueroa-Gonzalez,  
1101 A., Liu, B., Barker, D.J., and Morales, M. (2020). VTA Glutamatergic Neurons Mediate Innate  
1102 Defensive Behaviors. *Neuron*.
- 1103 47. Huang, L., Yuan, T., Tan, M., Xi, Y., Hu, Y., Tao, Q., Zhao, Z., Zheng, J., Han, Y., Xu, F., et al.  
1104 (2017). A retinoraphe projection regulates serotonergic activity and looming-evoked  
1105 defensive behaviour. *Nat Commun* *8*, 14908.
- 1106 48. Liang, F., Xiong, X.R., Zingg, B., Ji, X.Y., Zhang, L.I., and Tao, H.W. (2015). Sensory Cortical  
1107 Control of a Visually Induced Arrest Behavior via Corticotectal Projections. *Neuron* *86*, 755-  
1108 767.
- 1109 49. Chou, X.L., Wang, X., Zhang, Z.G., Shen, L., Zingg, B., Huang, J., Zhong, W., Mesik, L., Zhang,  
1110 L.I., and Tao, H.W. (2018). Inhibitory gain modulation of defense behaviors by zona incerta.  
1111 *Nat Commun* *9*, 1151.
- 1112 50. Li, L., Feng, X., Zhou, Z., Zhang, H., Shi, Q., Lei, Z., Shen, P., Yang, Q., Zhao, B., Chen, S., et al.  
1113 (2018). Stress Accelerates Defensive Responses to Looming in Mice and Involves a Locus  
1114 Coeruleus-Superior Colliculus Projection. *Curr Biol* *28*, 859-871 e855.
- 1115 51. Hurst, J.L., and West, R.S. (2010). Taming anxiety in laboratory mice. *Nature Methods* *7*, 825-  
1116 U1516.
- 1117 52. Peirce, J.W. (2007). PsychoPy - Psychophysics software in Python. *Journal of Neuroscience*  
1118 *Methods* *162*, 8-13.
- 1119 53. Govardovskii, V.I., Fyhrquist, N., Reuter, T., Kuzmin, D.G., and Donner, K. (2000). In search of  
1120 the visual pigment template. *Visual Neuroscience* *17*, 509-528.
- 1121 54. Jacobs, G.H., and Williams, G.A. (2007). Contributions of the mouse UV photopigment to the  
1122 ERG and to vision. *Documenta Ophthalmologica* *115*, 137-144.
- 1123 55. Hartley, R.I.a.Z., A. (2004). *Multiple View Geometry in Computer Vision*, Second Edition,  
1124 (Cambridge University Press).
- 1125 56. Cootes, T.F., Taylor, C.J., Cooper, D.H., and Graham, J. (1995). Active Shape Models - Their  
1126 Training and Application. *Computer Vision and Image Understanding* *61*, 38-59.
- 1127 57. Storchi, R., Zippo, A.G., Caramenti, G.C., Valente, M., and Biella, G.E. (2012). Predicting spike  
1128 occurrence and neuronal responsiveness from LFPs in primary somatosensory cortex. *PLoS*  
1129 *One* *7*, e35850.
- 1130 58. Storchi, R., Bale, M.R., Biella, G.E., and Petersen, R.S. (2012). Comparison of latency and rate  
1131 coding for the direction of whisker deflection in the subcortical somatosensory pathway. *J*  
1132 *Neurophysiol* *108*, 1810-1821.
- 1133 59. Milosavljevic, N., Storchi, R., Eleftheriou, C.G., Colins, A., Petersen, R.S., and Lucas, R.J.  
1134 (2018). Photoreceptive retinal ganglion cells control the information rate of the optic nerve.  
1135 *Proc Natl Acad Sci U S A*.
- 1136 60. Strong, S.P., Koberle, R., van Steveninck, R.R.D., and Bialek, W. (1998). Entropy and  
1137 information in neural spike trains. *Physical Review Letters* *80*, 197-200.
- 1138 61. Arthur, D., and Vassilvitskii, S. (2007). k-means plus plus : The Advantages of Careful Seeding.  
1139 *Proceedings of the Eighteenth Annual Acm-Siam Symposium on Discrete Algorithms*, 1027-  
1140 1035.
- 1141 62. Rissanen, J. (1983). A universal data compression system. *IEEE Transactions on Information*  
1142 *Theory* *29*, 656-664.

- 1143 63. Begleiter, R., El-Yaniv, R., and Yona, G. (2004). On Prediction Using Variable Order Markov  
1144 Models. *Journal of Artificial Intelligence Research* 22, 385-421.  
1145 64. Cleary, J., and Witten, I. (1984). Data Compression Using Adaptive Coding and Partial String  
1146 Matching. *IEEE Transactions on Communications* 32, 396-402.  
1147
